# Sequence learning recodes cortical representations instead of strengthening initial ones

Kristjan Kalm\*, Dennis Norris

MRC Cognition and Brain Sciences Unit, University of Cambridge  
15 Chaucer Road, Cambridge, CB2 7EF, UK

E-mail: [kristjan.kalm@mrc-cbu.cam.ac.uk](mailto:kristjan.kalm@mrc-cbu.cam.ac.uk).

## Abstract

We contrast two computational models of sequence learning. The associative learner posits that learning proceeds by strengthening existing association weights. Alternatively, recoding posits that learning creates new and more efficient representations of the learned sequences. Importantly, both models propose that humans act as optimal learners but capture different statistics of the stimuli in their internal model. Furthermore, these models make dissociable predictions as to how learning changes the neural representation of sequences. We tested these predictions by using fMRI to extract neural activity patterns from the dorsal visual processing stream during a sequence recall task. We observed that only the recoding account can explain the similarity of neural activity patterns, suggesting that participants recode the learned sequences using chunks. We show that associative learning can theoretically store only very limited number of overlapping sequences, such as common in ecological working memory tasks, and hence an efficient learner should recode initial sequence representations.

## Introduction

Here we investigate the neural mechanism involved in learning short visual sequences. The ability to remember or to perform events or actions in the correct order is critical to the performance of almost all cognitive tasks [1]. Understanding human sequence learning mechanism is crucial not only for understanding normal cognition, but also to understand the nature of the impairments and disabilities that follow when sequence learning is disrupted [2, 3, 4].

In this study we ask whether the changes in neural activity during sequence learning reflect a particular type of optimal learning strategy. An optimal learner is an agent whose internal model reflects the statistics of the environment [5, 6], and human learning has been shown to follow the optimal model in a wide range of domains such as speech and language [7, 8], visual scenes and objects [9, 10, 11, 12, 13], and sensorimotor control [14, 15]. However, statistical regularities across sequences can be represented in multiple ways [1]. First, sequences can be represented as simple associations (Fig 1A-B) and their statistics represented by weighting

28 the associations based on their relative frequency (Fig 1A-C). An optimal learner would up-  
29 date the association weights as new data comes in to reflect the statistics of the environment.  
30 Alternatively, learning can proceed by recoding frequently occurring associations using new  
31 latent representations. The latter approach has been termed 'chunking' in cognitive literature  
32 [16, 17] to describe learning where complex objects (words, faces) are constructed from lower-  
33 level features (phonemes, syllables, oriented lines). The crucial difference between these two  
34 learning approaches is that for associative learning the sequence codes remain the same, whilst  
35 new codes are inferred with recoding (Fig 1D). Therefore we can dissociate between these two  
36 mechanisms by comparing neural representations of novel sequences to learned ones.

37 Research on sequence learning has provided evidence for both learning mechanisms. Manual  
38 motor skill learning has been shown to decrease noise in learned representations [18, 19, 20]  
39 whilst not changing the representations of individual items in the sequence [21, 22]. Similarly,  
40 in the auditory domain frequently co-occurring sequence items elicit a neural response that  
41 indicates an increase in association strength [23]. Contrastingly, chunking has been observed  
42 widely in tasks where separate movements are integrated into a unified sequence [24], and in  
43 auditory-verbal sequence learning [25, 26, 27], where multiple co-occurring sequence items are  
44 bound together and recalled in all-or-nothing fashion [28, 29].

45 Importantly, both learning mechanisms reduce the amount information required to repre-  
46 sent stimuli [30, 11, 5] and therefore are hard to dissociate on the basis of simple univariate  
47 learning measures. For example, several past fMRI learning studies have observed two broad  
48 effects for learned stimuli: reduction of the BOLD signal and increase in pattern separability  
49 [31, 32, 33, 34]. However, such results do not inform us of the computations underpinning  
50 the learning process: any statistical learning mechanism will reduce uncertainty and hence  
51 decrease resource requirements [35]. Therefore broad univariate measures indicating more ef-  
52 ficient coding of learned stimuli, such as improvement in behavioural performance, reduction  
53 in the average BOLD response, or pattern separability, are expected *a priori* for any learning  
54 mechanism. Contrastingly, in this study we use fMRI to ask what is the computational mecha-  
55 nism underpinning learning in our task, rather than where in the brain can we detect learning

56 effects.

57 We first formally derive the associative and recoding models in the context of Bayesian op-  
58 timal learner. We show that the two accounts make dissociable predictions as to how sequences  
59 are encoded in the brain, and these predictions can be expressed in terms of the similarity of  
60 neural pattern activity. We tested these predictions in the dorsal visual processing stream using  
61 a sequence recall task together with the representational similarity analysis (RSA, [36, 37]) of  
62 fMRI data. We observed that only the recoding account can explain the similarity of neural ac-  
63 tivity patterns. Specifically, the encoding of sequences in the posterior parietal cortex changed  
64 from representing novel sequences as individual items to representing them as chunks after they  
65 had been presented several times.

66 Finally, we show that associative learning can effectively store only very limited number  
67 of similar (overlapping) sequences. Therefore an efficient learner should benefit from recoding  
68 initial sequence representations, since ecological learning tasks, such as reading or navigating,  
69 often involve a large number of multiple overlapping sequences (e.g. words, directions, recipes).

70 Taken together our findings represent strong theoretical and empirical evidence for a specific  
71 learning mechanism: human learning of short visual sequences proceeds by recoding initial se-  
72 quence representations with new ones within the same brain regions. Such recoding is necessary  
73 to enable efficient behaviour in complex tasks.

**Fig 1: Sequence learning.** (A) Four Gabor patches (items used in this study) associated with four sequence positions and the multinomial matrix representation of the sequence. (B) Item-position associations in monkey prefrontal cortex as observed by Berdyeva and Olson [38]. Each subplot displays spiking activity for a particular neuron: the first one responds most to items at the beginning of a three-item sequence, the second for the ones in the middle, and the last one for items at the end of the sequence. Numbers on x-axis mark the onset of the stimulus events. (C) Visual representation of three sequences as position-item associations and the resulting frequency of associations. The frequency of associations can be learned as a model of the environment. (D) Dissociating between learning mechanisms in terms of similarity between novel and learned sequences: with associative learning (left) learned sequences share the same item codes with novel ones. Furthermore, learning reduces noise in learned sequence representations. Recoding (right) changes item representations so that novel and learned stimuli do not share representations.

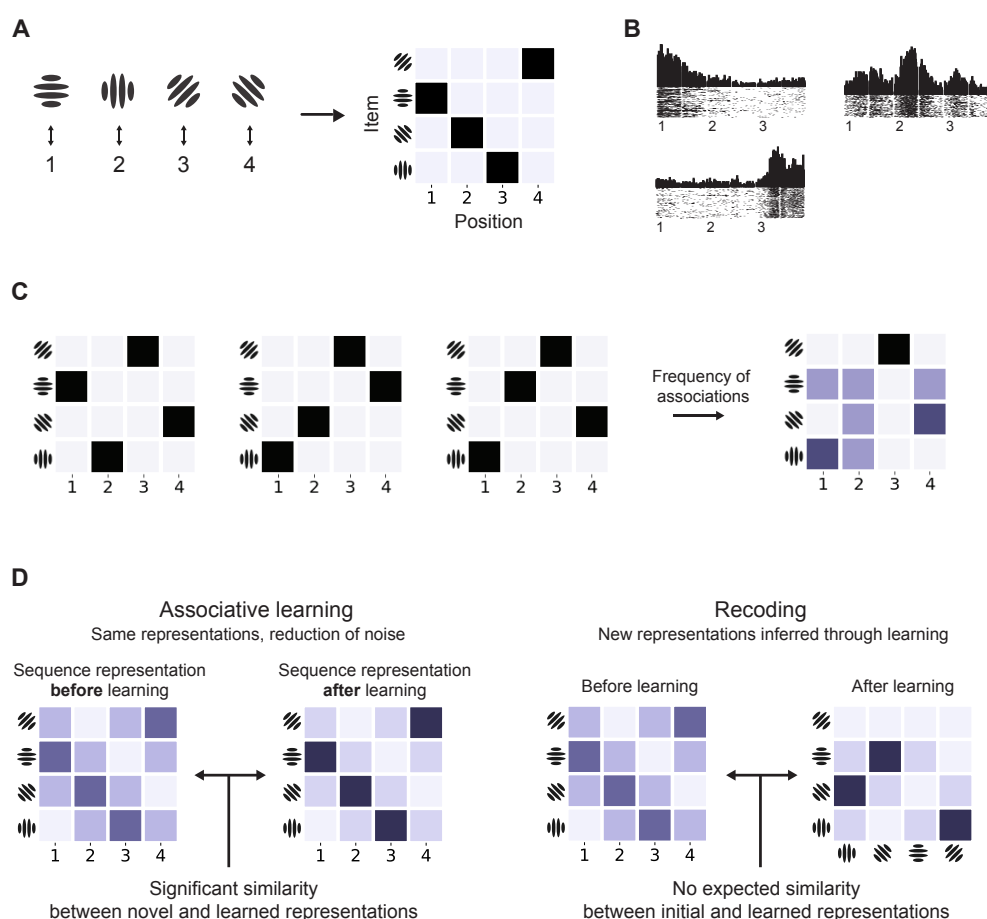

## 74 Results

### 75 Behaviour

76 We used a task requiring ordered recall of a sequence of simple visual stimuli, where some  
77 of the sequences are presented only once (*novel* sequences) and some are presented multiple

78 times (*repeating* sequences, Fig 2). Only two individual sequences were repeated and we first  
 79 presented them 12 times each during a practise session. This ensured that those two individual  
 80 sequences were learned to criterion before the beginning of the main experiment. The repeating  
 81 and novel sequences were designed maximally dissimilar to each other so that learning of the  
 82 repeating sequences would not transfer to the novel ones. We proceeded to present the two  
 83 familiar repeating sequences interleaved with novel sequences (Fig 2B).

**Fig 2: Task.** (A) Single trial: participants had to recall a sequence of four Gabor patches in the order they were presented after a 4.8s delay period using a button-box. The size of the stimuli within the display area is exaggerated for illustrative purposes. (B) Trial types and progression: 2/3 of the trials were repetitions of the same two individual sequences (*repeating* sequences), while 1/3 of the trials were novel unseen orderings of the items (*novel* sequences). The identity and order of repeating and novel sequences were pseudo-randomised across participants.

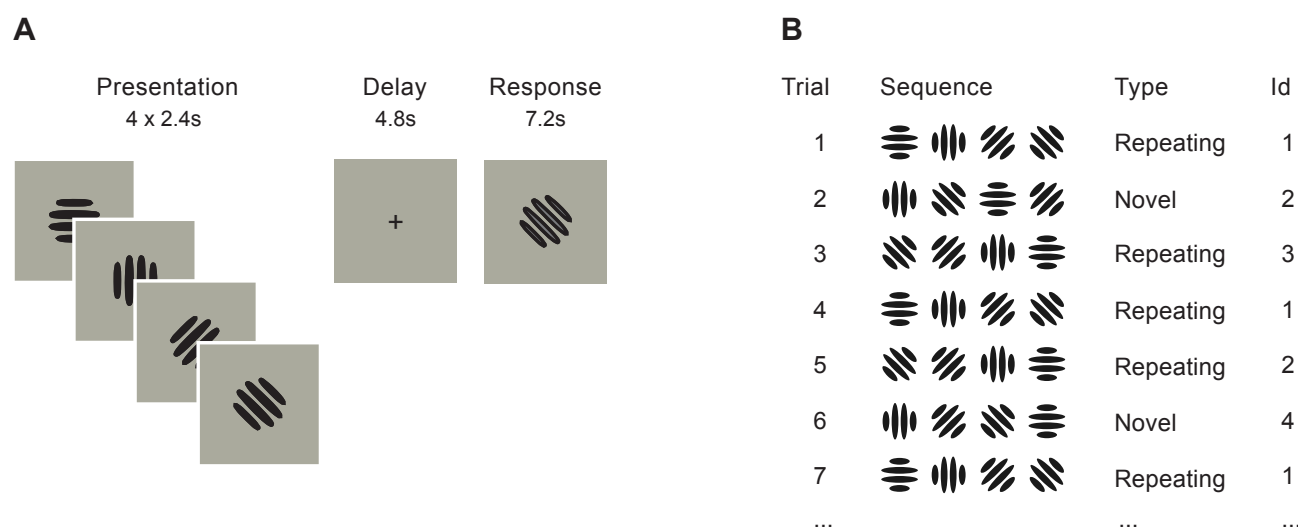

84 We observed that novel and repeating sequences were processed differently by participants.  
 85 We calculated two behavioural measures of recall for both types of sequences: how many  
 86 items were recalled in the correct position, and the average time between consecutive key  
 87 presses. The proportion of correctly recalled items was roughly the same for novel and repeating  
 88 sequences: 0.96 vs. 0.97, with no significant difference across subjects ( $p = 0.22, df = 21$ ).  
 89 This was expected since both novel and repeating sequences were only four items long and  
 90 should therefore fit within participants' short term memory spans. However, participants were  
 91 consistently faster in recalling repeating sequences: the average time between consecutive key  
 92 presses was 0.018 seconds shorter for repeating sequences ( $t = -3.04, p = 0.007, df = 21$ ).

93 Next, we sought to establish how the neural representation of novel sequences differs from the  
94 repeating, learned ones: specifically, whether there is a change in representation that supports  
95 either the associative learning or recoding hypotheses.

## 96 **fMRI evidence for learning models**

97 A learning model has two components: a model of representation for novel sequences and  
98 another for learned sequences. We assume that the difference between these two representations  
99 is the effect of the learning mechanism. Specifically, associative and recoding mechanisms make  
100 different predictions on the similarity between novel and repeating sequences. These predictions  
101 are formalised as representational dissimilarity matrices (RDM, Fig 3), which are then fitted  
102 with fMRI activity patterns using the representational similarity analysis (RSA, [36], Fig 3).

### 103 **Associative learning model**

104 An ideal learner should infer internal representations that reflect the statistics of the environ-  
105 ment. Intuitively, associative learning can be thought of as changing the weights of associations  
106 so that they reflect the frequency of past occurrences (Fig 1C). This can be formalised using  
107 the Dirichlet-Multinomial distribution, which encodes how many times particular discrete as-  
108 sociations have occurred: the full description of the model and its parameters can be found in  
109 *Associative learning in Methods*.

110 The associative learning model makes two predictions that can be expressed in terms of between-  
111 sequence similarity (Fig 3). First, both novel and repeated sequences should be encoded with  
112 the same sequence representation model since associative learning only changes the noise levels  
113 in the representations. In other words, if novel sequences are encoded as item-position associ-  
114 ations, so should the learned ones. We tested this hypothesis with two classical sequence rep-  
115 resentation models: item-position associations, where sequences are formed by mapping items  
116 to their ordinal positions; and item-item associations, where consecutive items are associated  
117 with each other (see *Sequence representation models* in *Methods*).

118 Second, the associative learner predicts that the repeating (learned) sequences should be

**Fig 3: Testing the predictions of learning models using RSA.** *Left:* model prediction expressed as a representational dissimilarity matrix (RDM) of pairwise between-stimulus distances. The small matrices on the top refer to the representations of individual sequences in the matrix form (as shown on Fig 1). For example, second cell in the first row is the predicted distance between sequences presented on trials 1 and 2. *Right:* RDM of measured voxel activity patterns elicited by the stimuli. The small matrices are illustrative representations of voxel patterns from an arbitrary brain region. The correlation between these two RDMs reflects the evidence for the predictive model. The significance of the correlation can be evaluated via permuting the labels of the matrices and thus deriving the null-distribution. See *Representational similarity analysis (RSA)* in *Methods* for details.

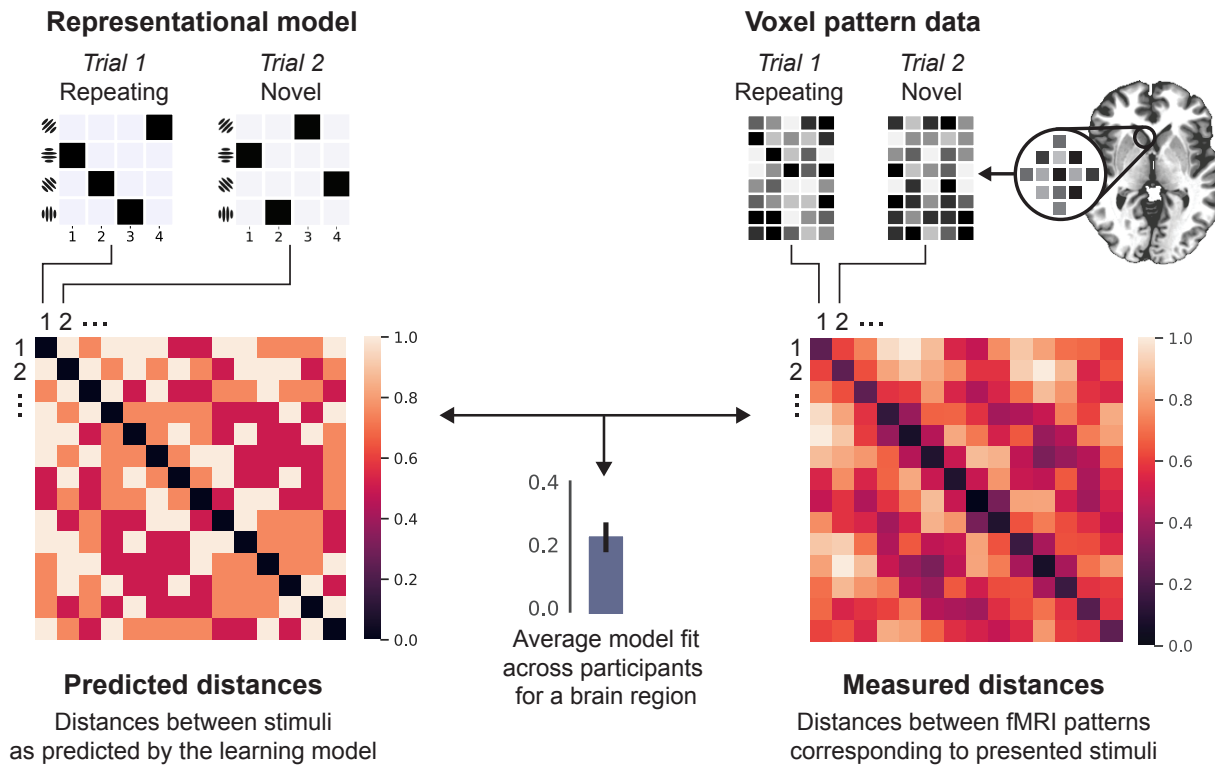

119 represented with less noise: the repetition of sequences should strengthen the weights of indi-  
120 vidual associations. Therefore, noise in activity patterns generated by novel sequences should  
121 be greater than for repeating sequences and hence the expected similarity *between* repeating  
122 and novel sequences should be greater than *within* novel sequences (see *Associative learning*  
123 *predictions for RSA* in *Methods*). To give testing anatomic specificity we parcellated the dorsal  
124 visual processing stream bilaterally into 74 anatomically distinct regions.

125 *No evidence for associative learning in neural representations*

126 We found no evidence for the first associative learning prediction: novel and repeating



127 sequences were not encoded similarly in any of the brain regions. To further explore this  
 128 null-result, we looked at the representation of novel and repeating sequences separately. We  
 129 found that novel sequences were represented as item-position associations in eight regions in the  
 130 dorsal visual processing stream (Table 1; also see Fig 9 in *Supplementary information* for plots  
 131 for individual brain regions). However, in all of the eight regions where the associative item-  
 132 position model predicted similarity between novel sequences, it failed to predict the similarity  
 133 between novel and repeating sequences ( $df = 21, p > 10^{-3}$ ). This shows that, contrary to the  
 134 predictions of the associative models, repeating and novel sequences did not share a common  
 135 representational code in our task.

**Table 1: Representation of novel sequences as item-position associations.** Anatomical region suffixes indicate gyrus (G) or sulcus (S). Asterisks (\*) represent significant evidence for the item-position model reaching the lower bound of the noise ceiling in any of the three task phases: presentation, delay, and response. The lower noise ceilings were significantly greater than zero for all regions displayed in the table ( $df = 21, p < 10^{-3}$ ); see *Noise ceiling estimation* in *Methods* for details).

| Lobe      | Name                                | Presentation | Delay | Recall |
|-----------|-------------------------------------|--------------|-------|--------|
| Frontal   | Central S                           |              | *     | *      |
| Occipital | Occipital Inferior G S              |              |       | *      |
| Occipital | Occipital Middle Lunatus S          | *            |       |        |
| Parietal  | Intraparietal Postero-Transversal S |              |       | *      |
| Parietal  | Parietal Inferior-Supramarginal G   | *            |       |        |
| Parietal  | Postcentral G                       | *            | *     |        |
| Parietal  | Postcentral S                       | *            |       |        |
| Temporal  | Temporal Superior S                 |              |       | *      |

136 The associative learning model also predicts that the noise in the activity patterns generated  
 137 by novel sequences should be greater than for repeating sequences and hence the expected  
 138 similarity *between* repeating and novel sequences should be greater than *within* novel sequences.  
 139 In other words, it should be easier to find evidence for associative codes between repeating and  
 140 novel sequences than for novel sequences alone. Hence the lack of evidence we observe for  
 141 associative learning cannot be attributed to the lack of fMRI measurement sensitivity.

142 *No behavioural evidence for associative learning*

143 There was also no behavioural evidence for associative learning: increased probability for

144 associations present in the repeating sequences should affect novel sequences where such as-  
145 sociations are also present. For example, repeated exposure to a sequence  $ABCD$  should  
146 also boost  $BDCA$  since  $C$  appears at the 3rd position in both. We tested this prediction by  
147 comparing response times for individual item-position associations in novel sequences: there  
148 was no advantage for those associations which were shared with the two repeating sequences  
149 ( $t = 0.28, p = 0.78, df = 21$ ).

## 150 **Recoding model**

151 The recoding model posits that statistical regularities across sequences can be used to infer  
152 representations where frequently co-occurring stimuli are recoded using a single code. For  
153 example, if two individual items in a sequence occur next to each more frequently than apart  
154 then an optimal learner should infer a model of the environment where those two adjacent items  
155 have been generated by a single latent variable. Formally, participants' internal representations  
156 of sequences are therefore recoded inferred as latent variables given the observed sequences:

$$p(\theta|\mathbf{S}) = \frac{p(\mathbf{S}|\theta)p(\theta)}{p(\mathbf{S})}, \quad (1)$$

157 where  $\theta$  is the internal latent model of a set of sequences  $\mathbf{S} = \{\mathbf{y}_1, \dots, \mathbf{y}_m\}$ . Here we call this  
158 latent representation a *chunking model*, in line with previous literature [17, 16, 1].

159 A chunking model  $\theta_i$  is defined by two parameters and their probability distributions  
160  $p(\mathbf{x}, \mathbf{z}|\theta_i)$ , where  $\mathbf{x}$  is a set of individual chunks, and  $\mathbf{z}$  a set of mappings defining how chunks  
161 are arranged together to encode observed sequences. For example, regularities within a set  
162 of two sequences  $\mathbf{S} = \{ABCD, CDAB\}$  can be expressed by two chunks  $\mathbf{x} = \{AB, CD\}$  and  
163 their mappings to the observed data  $\mathbf{z} = \{((A, B), (C, D)), ((C, D), (A, B))\}$ . Here we represent  
164 chunks formally as *n-grams*: for example, a four-item sequence  $ABCD$  can be represented by  
165 a tri-gram  $ABC$  and a uni-gram  $D$ ; or two uni-grams  $A$  and  $B$  and a bi-gram  $CD$ , etc.

166 Next, we estimated the optimal chunking model for the sequences in our task: given the  
167 many possible ways sequences could be chunked, we assumed that the optimal learner would

168 employ a chunking model that finds the most efficient encoding. The full formal description of  
 169 the chunking models, their parameters, and the process of inferring the optimal model can be  
 170 found in *Chunk learning* in *Methods*. Importantly, we designed the presentation of repeating  
 171 and novel sequences so that the optimal model would remain the same for every trial across  
 172 the experiment: every repeating sequence was encoded with a single four-gram chunk, and  
 173 every novel sequence with four uni-grams ( Fig 4, bottom row). Knowing the optimal chunk  
 174 representation allowed us to calculate pairwise distances between sequences as defined by their  
 175 constituent chunks. The resulting RDM of n-gram distances was then fit with neural activity  
 176 patterns using the RSA method (Fig 3).

177 Note that the optimal chunking model predicts the same representation for novel sequences  
 178 as the associative item-position model. This is because the optimal chunking model encodes  
 179 novel sequences with four one-item chunks resulting in the same number of item codes associated  
 180 with the same positions (see Fig 4). In other words, both models' predictions for novel sequence  
 181 representation are the same. However, the two models make different predictions about the  
 182 similarity *between* the repeating and novel sequences.

**Fig 4: Sequence representation in associative and recoding models.** Associative (top) and chunk recoding (bottom) models encode items in individual sequences differently. Differently coloured letters and boxes refer to individual item codes. For the chunk recoding model (bottom) item codes reflect the optimal chunking structure estimated with Bayesian model comparison. Note that the representation of the novel sequence (Trial 2) contains the same number of item codes at same positions for both models.

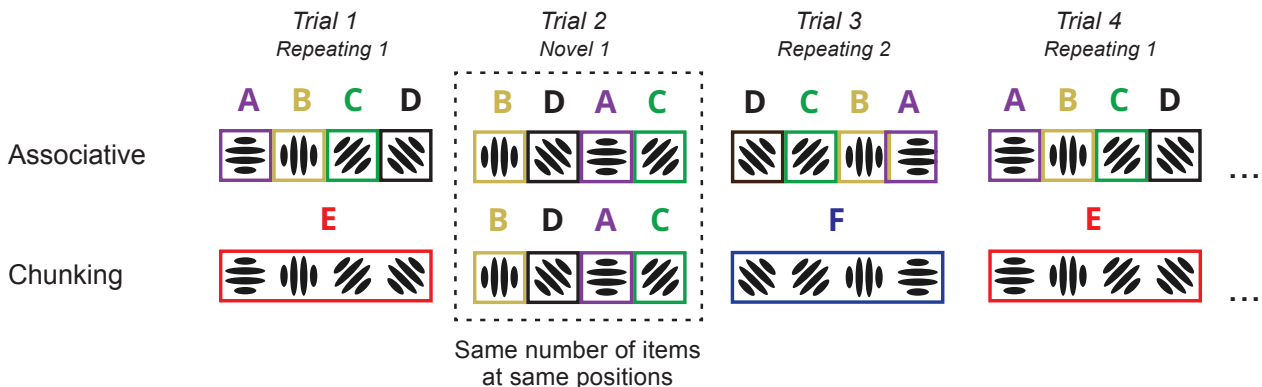

183 *Chunk recoding predicts the similarity between novel and repeating sequences*

184 We found significant evidence for the recoding model in three brain regions: the parietal  
185 inferior-supramarginal gyrus, the postcentral sulcus, and the occipital superior transversal sul-  
186 cus (Fig 5A). As predicted by the recoding model, the representation of sequences in all three  
187 regions followed a model where novel sequences are encoded with four one-item chunks but  
188 repeating sequences with single chunks, indicating a change in the representational code. The  
189 evidence for the recoding model was only statistically significant for the presentation phase of  
190 the task and not during the delay or the response phases.

**Fig 5: Evidence for the recoding model.** (A) The recoding model predicted the distance between pairs of voxel activity patterns corresponding to novel and repeating sequences in three brain regions. 'R' and 'AL' on the X-axis refer to the recoding and associative learning models respectively. Y-axis displays the model fit in terms of participants' average Spearman's rank-order correlation. Dots represent individual participants' values and error bars around the mean represent bootstrapped 95% confidence intervals. Coloured dashed lines represent the lower and upper bounds of the noise ceiling for the recoding model. In all displayed plots the lower noise ceilings were significantly greater than zero across participants. (B) Regions which encode both novel and repeating sequences as predicted by the recoding model projected on the glass brain for a single participant (P-9) in the MNI152 standard space. Red: the parietal inferior-supramarginal gyrus; green: the postcentral sulcus; blue: the occipital superior transversal sulcus. Top: axial slices; bottom: sagittal slices, left hemisphere. Superimposed on the brain template is the statistical map of  $t$ -values (magenta-cyan) of the univariate BOLD difference for learned stimuli (repeating/learned < novel sequences).

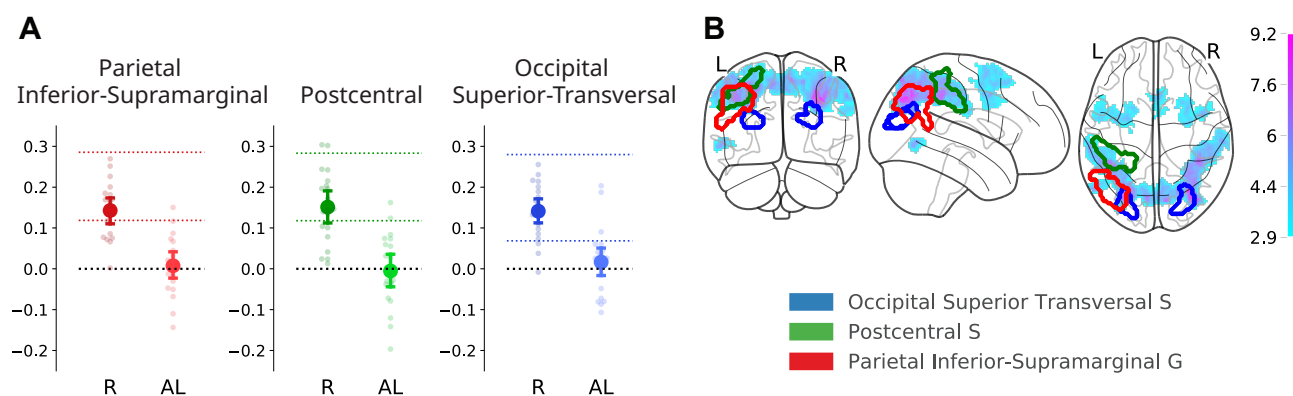

## 191 Model-free fMRI analyses of learning effects

192 We carried out two additional model-free fMRI analyses contrasting the representation of novel  
193 sequences to repeating ones. This was done to gauge how consistent our results were with  
194 previous fMRI studies which have shown two broad fMRI learning effects: reduction of the  
195 BOLD signal and increase in fMRI pattern separability for learned stimuli [31, 32, 33, 34].

## 196 **Univariate BOLD difference for learned stimuli**

197 We carried out a whole-brain univariate analysis to test whether the average BOLD response  
198 differed between novel and repeating sequences. We found extensive bilateral reduction in the  
199 mean BOLD response for repeating sequences (Fig 5B). This extended across parietal and  
200 pre-motor regions and was mostly absent in the primary visual and motor areas.

201 Note that the univariate change for the repeating sequences does not address the main hy-  
202 pothesis of this study, neither does it provide an alternative explanation of the data. Any neural  
203 learning mechanism is expected to make representations more efficient and therefore decrease  
204 the computational and metabolic cost of inference [5]. Both associative learning and recoding  
205 predict more efficient representations: we cannot dissociate between learning retaining the same  
206 codes (associative learner) and recoding by simply measuring behavioural improvement or total  
207 change in metabolic cost (univariate BOLD).

### 208 *Changes in voxel pattern noise*

209 To gain more insight into learning-induced changes we tested whether the voxel pattern  
210 distances within and between novel and repeating sequences change across the experiment. For  
211 example, do the neural voxel patterns corresponding to the two repeating sequences become  
212 more dissociable over the experiment? Specifically, we tested for significant changes in voxel  
213 pattern distance (a) between the repeating sequences, (b) within the individual repeating se-  
214 quences, (c) between the repeating and novel sequences, (d) within novel sequences. For full  
215 details on the distance analyses see *Model-free fMRI analyses of learning effects* in *Methods*.  
216 We found no brain regions where any of the voxel pattern distance change measures were  
217 statistically significant across the participants ( $df = 21, p > 10^{-3}$ ).

218 Note that these model-free analyses were fundamentally different from the RSA approach  
219 employed for the comparison of the learning models above: here we did not measure the change  
220 in distances as predicted by a learning model but instead gauged whether the variance of the  
221 voxels' responses changed across the experiment.

## 222 **Recoding provides more efficient representation of multiple sequences** 223 **than associative learning**

224 To further explore why recoding might be an advantageous learning mechanism we contrasted  
225 the effective learning capacity between the two learning models. Specifically, we estimated how  
226 much would multiple to-be-learned sequences interfere with each other. For example, a single  
227 sequence can readily be learned by strengthening the item-position associations. However, such  
228 a coding scheme would struggle to effectively learn multiple overlapping sequences. For exam-  
229 ple, two sequences *ABCD* and *BADC* can be learned simultaneously by storing position-item  
230 associations (Fig 6A), but this would result in eight association weights of equal strength to  
231 represent four sequences (*ABCD*, *BADC* and *ABDC*, *BACD*; Fig 6B). Such a learning mech-  
232 anism would suffer from catastrophic interference with multiple short sequences of overlapping  
233 items. Most naturally occurring sequences (words or sentences in a language, events in tasks  
234 like driving a car or preparing a dish) do not consist of items or events which only uniquely  
235 occur in that sequence. Hence an efficient sequence learning mechanism has to be able to learn  
236 multiple overlapping sequences, which are re-orderings of the same items.

237 The interference resulting from strengthening of individual associations can be quantified  
238 for each learning model in terms of shared representations causing such interference. In the  
239 associative item-position model any individual sequence will have an expected similarity to all  
240 other possible sequences (Fig 6A). For example, *ABCD* shares two item-position associations  
241 with *DBCA*, and so forth. On the average, any individual 4-item sequence encoded with  
242 the item-position model shares two items with 21% of all the other possible sequences, while  
243 only 31% share no associations and about 5% share 3 out of 4 associations (Fig 6C). As more  
244 sequences are learned the interference between stored representations will inevitably increase  
245 since the number of possible associative codes in the item-position model is limited to the  
246 number of items  $\times$  positions. Fig 6E shows that the effective capacity of learning different  
247 overlapping sequences with the associative item-position model is approximately five: at that  
248 point there are no sequences left which have been unaffected by learned sequences.

**Fig 6: Interference in sequence learning.** (A) Visual representation of two sequences as position-item associations (top) and the resulting frequency of associations (bottom) as defined by the associative sequence learning model. (B) Associative learning of two sequences on panel (A) would boost the representations of four individual sequences despite the statistical regularities being extracted from only two. See *Associative learning of overlapping sequences* in *Supplementary information* for a worked example. (C) Histogram of the expected number of shared codes (item-position associations, x-axis) in an item-position model for a single 4-item sequences with all other possible 4-item sequences ( $n = 256$ , allowing repeats) measured as a proportion of sequences sharing the same number of codes (y-axis). (D) Histogram of the shared codes for a two-item (bi-gram) chunk representation. (E) Interference between sequence representations in the item-position model. X-axis displays how many sequences have been learned and lines on the plot display the proportion of other sequences affected by learning as a function of codes shared: the lines correspond to columns in panel (C). The red line shows the proportion of sequences which have been unaffected by learning. (F) Interference between sequence representations in the chunk model.

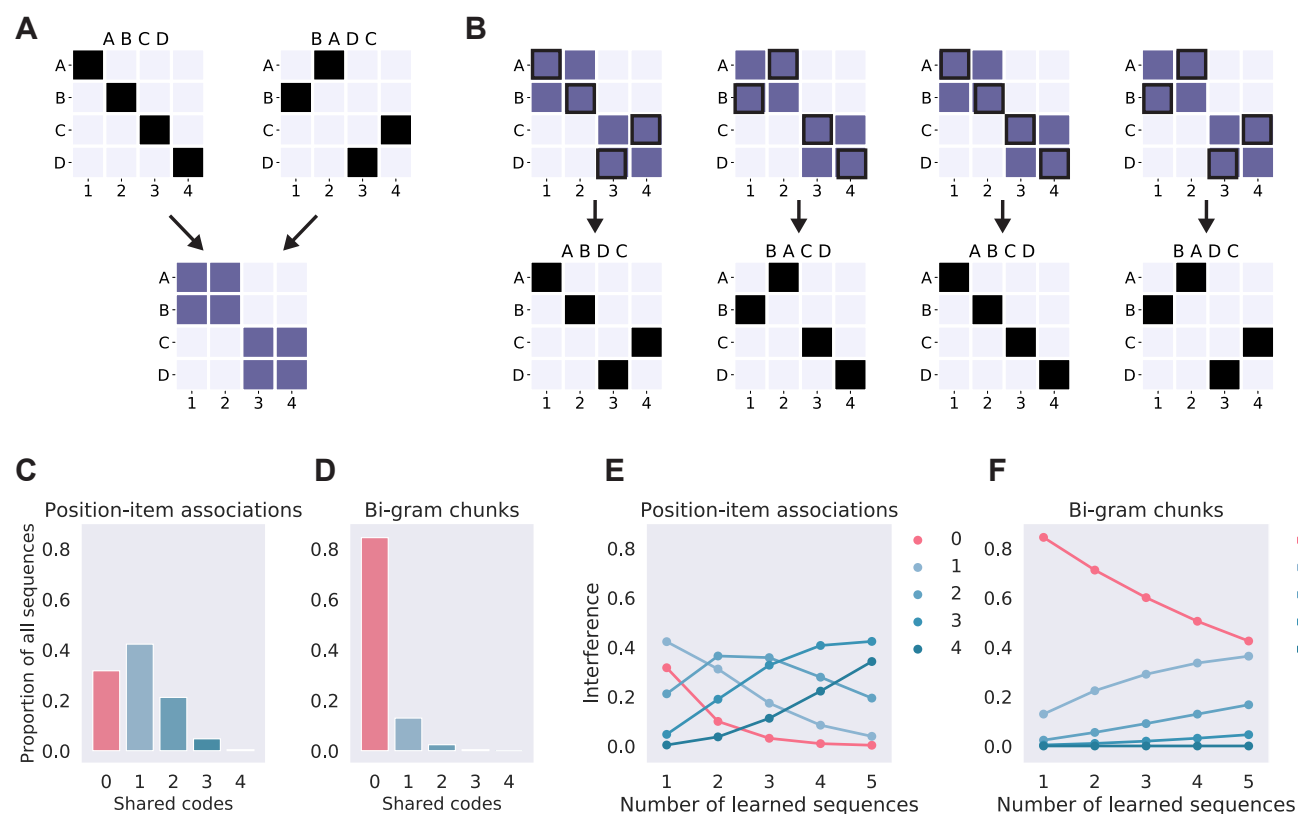

249 Contrastingly, a chunk recoding model that only uses two item chunks (bi-grams), has a  
 250 markedly different expected similarity distribution (Fig 6D), resulting in significantly reduced  
 251 interference between learned sequences (Fig 6F). Note that the bi-gram chunking model used  
 252 here for illustrative purposes is the most limited chunking model possible: any flexible chunking  
 253 model – such as the one estimated for our participants – will perform significantly better. A  
 254 chunking model that is free to infer any number of chunks of any length can represent any



255 number of multiple overlapping sequences without interference [39].

256 In sum, associative learning employs fewer codes but therefore necessarily loses in the rep-  
257 resentational power or 'coverage' over multiple overlapping sequences. Contrastingly, chunking  
258 allows emergence of more dissimilar codes which can be used to cover the space of all possible  
259 sequences with little interference.

## 260 Discussion

261 In the current study we contrasted two classes of sequence learning models. First, we considered  
262 associative learning that proceeds by changing the signal-to-noise ratio of existing representa-  
263 tions. Alternatively, repeated presentations might lead the initial representations to be recoded  
264 into more efficient representations such as chunks. Both mechanisms would result in more effi-  
265 cient codes and improve performance in the task: by either reducing uncertainty in the internal  
266 representations (associative learning) or reducing the necessary number of associations (chunk  
267 recoding). However, the two accounts make different predictions about changes the similarity  
268 between novel and repeating sequences.

### 269 Learning induces recoding of sequence representations

270 We found that *novel* visual sequences were represented as position-item associations in a num-  
271 ber of anatomically distinct regions in the dorsal visual processing stream. This is in line with  
272 previous research reporting that initial sequence representations are associative, binding indi-  
273 vidual events to a temporal order signal which specifies their position in a sequence [40, 41].  
274 However, we found no evidence that *repeated* sequences were also represented positionally, as  
275 would be predicted by the associative learning model. Instead, we observed that learning pro-  
276 ceeds by recoding the initial stimuli using a different set of codes. Specifically, the similarity  
277 between repeated and novel sequences followed predictions of the optimal chunking model in  
278 three cortical regions in the parietal lobe.

279 Such flexible recoding of stimuli in response to the changing statistics of the environment is



280 a common and often necessary feature of probabilistic learning models (see Fiser et al. [5] for  
281 a review). However, most neural learning models assume that different populations represent  
282 different stages of learning: for example, a traditional hippocampal-cortical learning account  
283 assumes that the fast acquisition of initial associations is supported by the dynamics of the  
284 hippocampus proper while the cortical areas encode the consolidated representations [42]. Here  
285 we show that the same cortical region encodes both initial and learned representations.

286 Our findings are also consistent with behavioural data on memory for sequences where there  
287 is evidence for the use of positional coding when recalling novel sequences [43] while learned  
288 verbal sequences show little indication of positional coding [25].

## 289 **Recoding provides more efficient encoding of multiple overlapping** 290 **sequences**

291 Recoding initial sequence representations is also advantageous from an efficient coding perspec-  
292 tive: we showed that in our task an associative learner would be only able to effectively learn  
293 very few overlapping sequences, as it is limited by the space of possible associations. Con-  
294 trastingly, recoding by chunking creates higher-dimensional codes, which can effectively store  
295 a limitless number of overlapping sequences [39, 10, 5]. Although higher-dimensional codes re-  
296 quire more information to store than simpler low-dimensional associations, they are necessary  
297 to cover the vast space of possible overlapping sequences present in ecological working memory  
298 tasks such as reading, speaking, or navigating.

## 299 **Multiple and parallel systems for sequence learning**

300 It is important to note that our experimental task is significantly different from standard  
301 motor-sequence learning paradigms where learning proceeds through repetition of movements  
302 and consolidation can take several hours or days [44, 24, 45]. Here we used a serial recall  
303 task where individual sequences are typically learned in as few as 2-4 repeated presentations  
304 [46, 47] and learning proceeds even when no recall is attempted [48, 49]. Therefore learning

305 mechanisms observed in our study are probably more reflective of rapid learning of visual or  
306 auditory sequences rather than the slower acquisition of motor skills.

307 Fast sequence learning through recoding is likely only one of the multiple learning processes.  
308 Accumulating evidence points to subcortical learning – facilitated by the hippocampal forma-  
309 tion and basal ganglia – operating in parallel [50, 51, 52, 53] and the effects of both types of  
310 learning can be delineated for a single task in rodents [54]. Therefore we would expect the  
311 extent and the exact nature of learning-induced recoding to be dependent on the exact task  
312 and its properties.

## 313 **Conclusions**

314 Our results suggest that humans follow an optimal sequence learning strategy and recode initial  
315 sequence representations into more efficient chunks. We found no evidence for the hypothesis  
316 that learning involves strengthening existing associations. Furthermore, we show that asso-  
317 ciative learning without recoding is not theoretically capable of supporting long-term storage  
318 of multiple overlapping items. Although the initial associative representations of novel se-  
319 quences may be sufficient to support immediate recall, multiple sequences can only be learned  
320 by developing higher order representations such as chunks. Our findings show that such re-  
321 coded representations of learned visual sequences can be found in the occipito-parietal cortical  
322 regions.

## 323 **Methods**

### 324 **Participants**

325 In total, 25 right-handed volunteers (19-34 years old, 10 female) gave informed, written consent  
326 for participation in the study after its nature had been explained to them. Participants reported  
327 no history of psychiatric or neurological disorders and no current use of any psychoactive  
328 medications. Three participants were excluded from the study because of excessive inter-  
329 scan movements (see *fMRI data acquisition and pre-processing*). The study was approved  
330 by the Cambridge Local Research Ethics Committee (CPREC, Cambridge, UK; application  
331 PRE.2017.024).

### 332 **Task**

333 On each trial, participants saw a sequence of items (oriented Gabor patches) displayed in the  
334 centre of the screen (Fig 2A). Each item was displayed on the screen for 2.4s (the whole four-  
335 item sequence 9.6s). Presentation of a sequence was followed by a delay of 4.8s during which  
336 only a fixation cue '+' was displayed on the screen. After the delay, participants either saw  
337 a response cue '\*' in the centre of the screen indicating that they should manually recall the  
338 sequence exactly as they had just seen it, or a cue '-' indicating not to respond, and to wait  
339 for for the next sequence (rest phase; 10-18s). We used a four-button button-box where each  
340 button was mapped to a single item (see *Stimuli* below).

341 The recall cue appeared on 3/4 of the trials and the length of the recall period was limited  
342 to 7.2s. We omitted the recall phase for 1/4 of the trials to ensure a sufficient degree of de-  
343 correlation between the estimates of the BOLD signal for the delay and recall phases of the  
344 task. Each participant was presented with 72 trials (36 trials per scanning run) in addition to  
345 an initial practice session outside the scanner. In the practice session participants had to recall  
346 two individual sequences 12 times as they learned the mapping of items to button-box buttons.  
347 Participants were not informed that there were different types of trials.

## 348 Stimuli

349 All presented sequences were permutations of the same four items (see *Sequence generation and*  
350 *similarity* below on how individual sequences differed from each other). The items were Gabor  
351 patches which only differed with respect to the orientation of the patch. Orientations of the  
352 patches were equally spaced (0, 45, 90, 135 degrees) to ensure all items were equally similar to  
353 each other. The Gabor patches subtended a 6° visual angle around the fixation point in order  
354 to elicit an approximately foveal retinotopic representation. Stimuli were back-projected onto  
355 a screen in the scanner which participants viewed via a tilted mirror.

356 We used sequences of four items to ensure that the entire sequence would fall within the  
357 participants' short-term memory capacity and could be accurately retained in STM. If we had  
358 used longer sequences where participants might make errors (e.g. 8 items) then the representa-  
359 tion of any given sequence would necessarily vary from trial to trial, and no consistent pattern  
360 of neural activity could be detected. All participants learned which four items corresponded to  
361 which buttons during a practice session before scanning. These mappings were shuffled between  
362 participants (8 different mappings) and controlled for heuristics (e.g. avoid buttons mapping  
363 orientations in a clockwise manner).

## 364 Structure of the trials

365 To test our hypotheses we split the 14 individual sequences in to two classes: two of these were  
366 repeatedly presented through the experiment (*repeating* sequences, 2/3 of the trials) while the  
367 remaining 12 were previously unseen and were only presented once (*unique* sequences, 1/3 of  
368 the trials). The two individual repeating sequences were chosen randomly for each participant.

369 The two *repeating* sequences were also used for training before the scanning experiment  
370 (each presented 12 times). This was done to ensure that the two repeating sequences would be  
371 12 times more likely already at the start of the experiment and stay so throughout scanning  
372 (see *Optimal chunking model* for details).

373 To keep the relative probability of repeating and unique sequences fixed throughout the  
374 experiment we pseudo-randomised the order of trials so that on the average there was a single

375 unique sequence and two repeating sequences in three consecutive trials (Fig 2B). This ensured  
376 that after every three trials the participant exposure to repeated and unique sequences was the  
377 same (2/3 repeated, 1/3 unique sequences).

378 For MRI scanning we repeated this experimental block twice for every participant so that  
379 in a 36-trial scanning session participants recalled each unique sequence once and repeating  
380 sequences 12 times each (Fig 2B). Over two scanning sessions this resulted in 48 trials with  
381 repeating sequences and 24 trials with unique sequences.

### 382 **Sequence generation and similarity**

383 We permuted the same four items (oriented Gabor patches) into different individual sequences  
384 to resemble sequences in the natural world, which are mostly permutations of a small set of  
385 items or events based on the desired outcome (e.g. driving the car, parsing a sentence, etc).

386 We chose the 14 individual four-item sequences used in the experiment (2 repeating, 12  
387 unique) to be as dissimilar to each other as possible in order to avoid significant statistical reg-  
388 ularities between individual sequences themselves and instead be able to introduce regularities  
389 only through repeating the individual sequences (see *Chunk learning* for details).

390 We constrained the possible set of individual sequences with two criteria:

- 391 1. *Dissimilarity between all individual sequences*: all sequences needed to be at least three ed-  
392 its apart in the Hamming distance space (see *Similarity between sequence representations*  
393 for details on the Hamming distance between two sequences). For example, given a re-  
394 peating sequence  $\{A, B, C, D\}$  we wanted to avoid a unique sequence  $\{A, B, D, C\}$  as  
395 these share the two first items and hence the latter would only be a partially *unique*  
396 sequence. This would allow in chunk learning to encode both sequences with a common  
397 multi-item chunk  $AB$ .
- 398 2. *N-gram dissimilarity between two repeating sequences*: the two repeating sequences shared  
399 no items at common positions and no common n-grams, where  $n > 1$  (see *Chunk learning*  
400 for n-gram definition and details). This ensured that the representations of repeating  
401 sequences would not interfere with each other and hence both could be learned to similar

402 level of familiarity. Secondly, this ensured that for the chunking model the repetitions of  
403 these two sequences were optimally encoded with two four-grams since they shared no  
404 common bi-grams of tri-grams.

405 Given these constraints, we wanted to find a set of sequences which maximised two statistical  
406 power measures:

- 407 1. *Between-sequence similarity score entropy*: this was measured as the entropy of the lower  
408 triangle of the between-sequence similarity matrix. The pairwise similarity matrix be-  
409 tween 14 sequences has  $14^2 = 196$  cells, but since it is diagonally identical only 84 cells  
410 can be used as a predictor of similarity for experimental data. Note that the maximum  
411 entropy set of scores would have an equal number of possible distances but since that is  
412 theoretically impossible, we chose the closest distribution given the restrictions above.
- 413 2. *Between-model dissimilarity*: defined as the correlation between pairwise similarity matri-  
414 ces of different sequence representation models (see *Similarity between sequence representations*).  
415 We sought to maximise the dissimilarity between model predictions, that is, decrease the  
416 correlation between similarity matrices.

417 The two measures described above, together with the constraints, were used as a cost  
418 function for a grid search over a space of all possible subsets of fourteen sequences ( $k = 14$ )  
419 out of possible total number of four-item sequences ( $n = 4!$ ). Since the Binomial coefficient of  
420 possible choices of sequences is ca  $2 \times 10^6$  we used a Monte Carlo approach of randomly sampling  
421  $10^4$  sets of sequences to get a distribution for cost function parameters. This processes resulted  
422 in a set of individual sequences which were used in the study: see *Individual sequences used in*  
423 *the task in Supplementary information*.

## 424 **Sequence representation models**

425 Sequences are associative codes: they are formed either by associating successive items to each  
426 other (item-item associations) or by associating items to some external signal specifying the  
427 temporal context for sequences (item-position associations).

428 In the case of item-position associations sequences are formed by associating items to some  
429 external signal specifying the temporal context. This context signal can be a gradually changing  
430 temporal signal [55, 56, 57], a discrete value specifying the item’s position in a sequence [58], or a  
431 combination of multiple context signals [59, 60]. Common to all of these models is the underlying  
432 association of item representations to the positional signal, forming item-position associations  
433 (Fig 1A). Alternatively, for item-item associations the weights of the associations are usually  
434 expressed in terms of transitional probabilities [1] forming a ‘chain’ of associations [61]. Past  
435 research has provided evidence for both: sequences are represented as item-position associations  
436 in rodent, primate, and humans brains [62, 63, 64] and also as item-item associations [65]  
437 depending on task type and anatomical area (see [1] for a review).

438 For our sequence processing task (Fig 2) we model the participants’ internal sequence rep-  
439 resentations  $\mu$  given the presented sequence  $y$  as Bayesian inference (Eq 2), where the posterior  
440 distribution  $p(\mu|y)$  represents a participant’s estimate of the presented stimulus, and their re-  
441 sponse can be thought of as a sample from the posterior distribution:

$$\overbrace{p(\mu|y)}^{\text{posterior}} \propto \overbrace{p(y|\mu)}^{\text{likelihood}} \cdot \overbrace{p(\mu)}^{\text{prior}} \quad (2)$$

442 Associations between discrete variables – such as items, or items and positions – can be  
443 formalised as a multinomial joint probability distribution. The multinomial representation can  
444 in turn be visualised as a matrix where each cell describes the probability of a particular item  
445 at a particular position (Fig 1).

446 Formally, every item  $x$  in the sequence  $z$  is represented by a multinomial variable which can  
447 take  $K$  states parametrised by a vector  $\boldsymbol{\mu} = (\mu_1, \dots, \mu_K)$  which denotes the probability of item  
448  $x$  occurring at any of  $k$  positions:

$$p(\mathbf{x}|\boldsymbol{\mu}) = \prod_{k=1}^K \mu_k^{x_k}, \quad (3)$$

449 and the whole  $N$ -item sequence  $\mathbf{z} = (x_1, \dots, x_N)^T$  is given by:

$$p(\mathbf{z}|\boldsymbol{\mu}) = \prod_{n=1}^N \prod_{k=1}^K \mu_k^{x_{nk}}, \quad (4)$$

450 where the  $\boldsymbol{\mu}$  represents the probability of particular item-position associations and hence  
451 must satisfy  $0 \leq \mu_k \leq 1$  and  $\sum_k \mu_k = 1$ . Exactly the same formalism applies to item-item  
452 associations: we simply replace the set of  $K$  position variables with another identical set of  $N$   
453 items.

## 454 Similarity between sequence representations

### 455 *Item-position associations*

When sequences are represented as item-position associations they can be described in terms of their similarity to each other: how similar one sequence is to another reflects whether common items appear at the same positions. Formally, this is measured by the Hamming distance between two sequences:

$$D_H(\mathbf{y}_j, \mathbf{y}_l) = \sum_{i=1}^k |x_j^i - x_l^i| \quad (5)$$

$$x_j^i = x_l^i \Rightarrow 0 \quad (6)$$

$$x_j^i \neq x_l^i \Rightarrow 1 \quad (7)$$

456 where  $x_j^i$  and  $x_l^i$  are the  $i$ -th items from sequences  $\mathbf{y}_j$  and  $\mathbf{y}_l$  of equal length  $k$ . Consider two  
457 sequences  $ABCD$  and  $CBAD$ : they both share two item-position associations ( $B$  at the second  
458 and  $D$  at the fourth position) hence the Hamming distance between them is 2 (out of possible  
459 4).

460 We use the between-sequence similarity as defined by the Hamming distance as a prediction  
461 about the similarity between fMRI activation patterns: if sequences are coded as item-position  
462 associations then the similarity of their corresponding neural activity patterns, all else being



463 equal, should follow the Hamming distance. This allows us to test whether a particular set  
464 of voxels encodes information about sequences using an item-position model. *Representational*  
465 *similarity analysis of fMRI activity patterns* below provides the details of the implementation.

#### 466 *Item-item associations*

467 Here we use n-grams as associations between multiple consecutive items to define sequences  
468 as pairwise item-item associations: a four-item sequence  $ABCD$  can be unambiguously repre-  
469 sented by three bi-grams  $AB$ ,  $BC$ ,  $CD$  so that every bi-gram represents associations between  
470 successive items. The bi-gram representation of item-item associations can be used to derive a  
471 hypothesis about the similarity between sequences: the between-sequence similarity is propor-  
472 tional to how many common item pairs they share. For example, the sequences  $FBI$  and  $BIN$   
473 both could be encoded using a bi-gram where  $B$  is followed by  $I$  (but share no items at common  
474 positions and are hence dissimilar in terms of item-position associations). This allows us to  
475 define a pairwise sequence similarity measure which counts how many bi-grams are retained  
476 between two sequences:

$$S_C(S_i, S_j) = \text{card}(C_i \cap C_j) \quad (8)$$

477 where  $C_i$  and  $C_j$  are the sets of n-grams required to encode sequences  $S_i$  and  $S_j$  so that  
478  $\text{card}(C_i \cap C_j)$  denotes the cardinality of the union of two sets of n-grams (i.e. the number  
479 of elements in the resulting set). All possible constituent n-grams of both sequences can be  
480 extracted iteratively starting from the beginning of sequence and choosing  $n$  consecutive items  
481 as an n-gram. For bi-grams this gives:

$$C_i = \{i = 1, \dots, k - 1 : (x_i, x_{i+1})\}$$

482 where  $C_i$  is a set of all possible adjacent n-grams from sequence  $S_i$  of length  $k$  so that every  
483 bi-gram is a pair (tuple) of consecutive sequence items  $(x_i, x_{i+1})$ . Similarly for a set of n-grams  
484  $C$  from any sequence of length  $k$ :

$$C = \{i = 1, \dots, k - (n - 1) : (x_i, \dots, x_{i+(n-1)})\},$$

485 where  $n$  is the length of n-gram. Effectively, the n-gram similarity counts the common  
486 members between two n-gram sets. Given sequence length  $k$  this similarity can accommodate  
487 n-grams of all sizes  $n$  (as long as  $n \leq k$ ). To make the measure comparable for different values  
488 of  $n$  we need to make the value proportional to the total number of possible n-grams in the  
489 sequence and convert it into a distance measure by subtracting it from 1:

$$D_C = 1 - \gamma \text{card}(C_i \cap C_j) \quad (9)$$

490 where  $\gamma$  is a normalising constant:

$$\gamma = \frac{1}{k - (n - 1)}.$$

491 Effectively, the n-gram distance  $D_C$  counts the common members between two n-gram sets.  
492 We then used the bi-gram distance measure to derive sequence representation predictions for  
493 item-item association models.

494 The prediction made by the n-gram distance  $D_C$  is fundamentally different from the predic-  
495 tion made by the Hamming distance  $D_H$  (Eq 7): the n-gram distance assumes that sequences  
496 are encoded as item-item associations whilst the Hamming distance assumes sequences are  
497 encoded as item-position associations.

498 To understand why the item-position and item-item models make inversely correlated pre-  
499 dictions, consider again the example given above: two sequences of same items  $FBI$  and  $BIF$   
500 are similar from a bi-gram perspective since both could be encoded using a bi-gram where  $B$   
501 is followed by  $I$  (but share no items at common positions and are hence dissimilar in terms  
502 of item-position associations). Conversely, two sequences  $FBI$  and  $FIB$  share no item pairs  
503 (bi-grams) and are hence dissimilar form a bi-gram perspective but have both  $F$  at the first  
504 position and hence somewhat similar in terms of the item-position model (Hamming distance).

505 *Item mixture*

506 We also defined an additional control model which tested for a null-hypothesis that instead  
507 of sequence representations neural activity could be better explained by the superposition of  
508 patterns for constituent individual items in the sequence, called the *item mixture model* (e.g.  
509 see Yokoi et al. [22]).

510 This model is not a sequence representation model but rather an alternative hypothesis  
511 of what is being captured by the fMRI data. This model posits that instead of sequence  
512 representations fMRI patterns reflect item representations overlaid on top of each other like a  
513 palimpsest so that the most recent item is most prominent. For example, a sequence *ABCD*  
514 could be represented as a mixture: 70% the last item (*D*), 20% the item before (*C*), and  
515 so forth. In this case the mixing coefficient increases along the sequence. Alternatively, the  
516 items in the beginning might contribute more and we would like to use a decreasing mixing  
517 coefficient. If all items were weighted equally the overall representations would be identical as  
518 each sequence is made up of the same four items. Here we only considered linearly changing  
519 coefficients: we did not consider non-linear or random weights.

520 Formally, we model an item mixture representation  $M$  of a sequence as a weighted sum of  
521 the individual item representations:

$$M = \mathbf{I}\beta \quad (10)$$

522 where  $\mathbf{I}$  is the four-dimensional representation of individual items in the sequence and  $\beta$  is  
523 the vector of mixing coefficients so that  $\beta_n$  is the mixing coefficient of the  $n$ -th item in  $\mathbf{I}$  so that

$$0 < \beta_n \leq 1, \text{ and } \sum_{m=1}^N \beta_n = 1.$$

524 where  $N$  is the length of the sequence. The rate of change of  $\beta$  (to give a particular  $\beta_n$  a  
525 value) was calculated as

$$\beta_n = \alpha\beta_0(1 - \theta)^n,$$

526 where  $\theta$  is the rate of change and  $\alpha$  normalising constant. In this study we chose the value  
527 of  $\theta$  so that  $\beta = \{0, 1/6, 1/3, 1/2\}$  represents a recency-weighted slope over individual sequence  
528 items. The reason we only tested for the 'recency mixture' is that the distances between  
529 mixtures only depend on the absolute value of the slope of the mixture coefficients over the  
530 items. In other words, an RDM derived with a recency-based item mixture predicts the same  
531 similarity between voxel patterns as an RDM derived with a primacy based mixture given the  
532 absolute value of the gradient slope remains the same. Here we chose a middle point between  
533 two extreme slope values: all the mixtures become the same when the slope is horizontally  
534 flat and only a single item contributes when the slope is vertical. See *Item mixture model*  
535 *parameters* in the *Supplementary information* for more details and a worked example.

536 Distances between two item mixture representations  $M_i$  and  $M_j$  (Eq 10) of sequences  $S_i$   
537 and  $S_j$  were calculated as correlation distances:

$$D_I(S_i, S_j) = \text{cdist}(M_i, M_j). \quad (11)$$

## 538 **Associative learning**

539 The optimal way of encoding how many times particular discrete associations have occurred  
540 is given by the Dirichlet-Multinomial model. In short, past occurrences of items at certain  
541 positions are transformed into probabilities, which reflect the frequency of associations. Hence  
542 associative learning can be thought of as changing the weights of associations –  $\boldsymbol{\mu}$  parameter  
543 in the multinomial model above – so that they reflect the statistics of the environment. This  
544 is achieved by deriving  $p(\boldsymbol{\mu})$  from the Dirichlet distribution:

$$\boldsymbol{\mu} \sim \text{Dir}(\boldsymbol{\alpha}) \quad (12)$$

545 where  $\boldsymbol{\alpha} = (\alpha_1, \dots, \alpha_K)^T$  denotes the effective number of observations for individual associ-  
546 ations. The optimal internal representation of associations for a sequence  $\mathbf{y}$  is therefore given

547 by:

$$p(\boldsymbol{\mu}|\mathbf{y}, \boldsymbol{\alpha}) \propto p(\mathbf{y}|\boldsymbol{\mu})p(\boldsymbol{\mu}|\boldsymbol{\alpha}). \quad (13)$$

548 We could also use  $\boldsymbol{\mu}$  to introduce additional biases into the model (e.g. recency or primacy  
549 effects) but since our task has short sequences and clearly distinctive individual items such  
550 additional biases are not significant (see *Behaviour* in *Results*).

551 In formal terms this means specifying the conjugate prior for the parameter  $\mu$  of the multi-  
552 nomial prior distribution (Eq 4), which is given by the Dirichlet distribution:

$$p(\boldsymbol{\mu}|\boldsymbol{\alpha}) = \phi \prod_{k=1}^K \mu_k^{\alpha_k - 1}, \quad (14)$$

553 where  $0 \leq \mu_k \leq 1$  and  $\sum \mu_k = 1$  and  $\phi$  is the normalisation constant. The parameters  $\alpha_k$  of the  
554 prior distribution can be interpreted as an effective number of observations  $x_k = 1$ , or in other  
555 words, the counts of the value of the sequence position  $x$  previously. Effectively, the conjugate  
556 prior tracks the item-position occurrence history. Since this model reflects the expected value  
557 of item-position associations it is also an optimal model of sequence representation assuming  
558 that associations are independent of each other.

559 Using position-item associations as defined above to encode a set of individual sequences  
560  $\mathbf{S} = (BACD, CABD, ABCD)$  will result in a following value for  $\boldsymbol{\mu}$  reflecting the position-item  
561 counts:

$$\boldsymbol{\mu} = \begin{pmatrix} 1/3 & 2/3 & 0 & 0 \\ 1/3 & 1/3 & 1/3 & 0 \\ 1/3 & 0 & 2/3 & 0 \\ 0 & 0 & 0 & 1 \end{pmatrix}$$

562 Here matrix rows and columns reflect the items and position variables. Changing or adding  
563 new sequences to the set will only change the probabilities or association weights but not  
564 change individual items bound by associations. This matrix is visualised for three item-position  
565 associations in Fig 1C.

## 566 **Chunk learning**

### 567 **Bayesian model comparison**

568 We want to estimate the posterior probability distribution of chunking models  $\theta$  given the  
569 observed data  $D$ :

$$p(\theta|D) = \frac{p(D|\theta)p(\theta)}{p(D)}, \quad (15)$$

and choose the model with the highest posterior probability:

$$\theta^{MAP} = \operatorname{argmax}_{\theta} [p(\theta|D)].$$

570 Since Bayesian model comparison (BMC) implements an inherent Occam's razor which  
571 penalises models in terms of their complexity we assign all models equal prior probabilities  
572  $p(\theta)$ . Therefore the posterior probability of any model is proportional to model *evidence*:

$$p(D|\theta_i) = \int p(\mathbf{S}|\mathbf{w}, \theta_i)p(\mathbf{w}|\theta_i)d\mathbf{w}, \quad (16)$$

573 where  $\mathbf{S}$  is a set of sequences (data),  $\theta_i$  a particular chunking model and  $\mathbf{w}$  its parameter values.  
574 Intuitively, to estimate *evidence* for any model we need to evaluate its complexity as defined  
575 by its parameters  $\mathbf{w}$  and their probability distributions  $p(\mathbf{w}|\theta_i)$ , and how well the model fits  
576 the data  $p(\mathbf{S}|\mathbf{w}, \theta_i)$ . By combining the model complexity and data fit we can rank all possible  
577 models in terms of their evidence  $p(D|\theta_i)$ . The model with the greatest evidence is also the  
578 model with maximum *a posteriori* probability since we assume equal prior probabilities across  
579 models.

### 580 **Chunking model**

581 A chunking model  $\theta_i$  is defined by two parameters and their probability distributions  $p(\mathbf{x}, \mathbf{z}|\theta_i)$ ,  
582 where  $\mathbf{x}$  is a set of individual chunks and  $\mathbf{z}$  a set of mappings defining how chunks are arranged  
583 together to encode observed sequences.

584 *Set of chunks*

We represent chunks formally as  $n$ -grams (used from hereon synonymously with the term 'chunk') that can take any length up the maximum possible length of a sequence to be encoded. For illustrative purposes we denote the individual items in our sequences here with letters: a four-item sequence of Gabors can be written as  $ABCD$  and in turn be represented by a tri-gram  $ABC$  and a uni-gram  $D$ . For 4-item sequences the set of all possible  $n$ -grams has the number of  $P$  members as the sum of partial permutations of  $n = 4$  items taken  $k = \{1, 2, 3, 4\}$  at a time:

$$P_N = \sum_{k=1}^n \frac{n!}{(n-k)!} = 64$$

585 A set of chunks  $\mathbf{x}$  comprises  $J$   $n$ -grams where each constituent  $n$ -gram  $c$  appears only once:  
586  $\mathbf{x} = \{c_1, \dots, c_J\}$ , and  $1 < J < P_N$ ; for example  $\mathbf{x} = \{AB, BA, A, B, CDA, ACDB\}$ . Each  
587 individual  $n$ -gram has a probability inversely proportional to its combinatorial complexity.  
588 Specifically, the probability of a particular  $n$ -gram  $c_j$  is proportional to the reciprocal of the  
589 number of partial permutations of  $n = 4$  items taken  $k$  at a time:

$$p(c_j) = \alpha \frac{1}{\frac{n!}{(n-k)!}}, \quad (17)$$

590 where  $k$  is the length of the  $n$ -gram and  $\alpha$  is the normalising constant. For example, there  
591 are 4 possible uni-grams for a 4-item sequence, but 12 bi-grams, 24 tri-grams, etc. Hence the  
592 probability of a uni-gram is 3 times greater than a bi-gram and so forth. This also captures  
593 the intuition that longer and more complex chunks should be less likely than simple chunks.  
594 We also assume that chunks are independent each other and hence the probability of a set of  
595  $n$ -grams  $\mathbf{x}$  defined by the chunking model is the product of its constituent chunk probabilities:

$$p(\mathbf{x}|\theta_i) = \prod_{j=1}^J p(c_j). \quad (18)$$

596 *Mappings between chunks*

597 The second parameter of the chunking model describes how individual n-grams are combined  
 598 together to encode the observed sequences. For example, given a single sequence  $ABCD$  and  
 599 a set of n-grams  $\mathbf{x} = \{AB, BC, CD, A, B, C, D\}$  we can encode the data as  $(AB, CD)$  or  
 600  $(A, BC, D)$  as both mappings are capable of representing the observed data without error.

For any 4-item sequence there are eight possible ways n-grams can be linked together to reproduce the observed sequence. These mappings can be described as a set of eight tuples  $\mathbf{Z} = \{\mathbf{g}_1, \dots, \mathbf{g}_8\}$ , where each tuple defines  $F \leq 4$  links  $\mathbf{g}_i = ((l_1), \dots, (l_F))$  that exhaustively define all possible n-gram parses of a 4-item sequence:

$$\begin{aligned} \mathbf{Z} = \{ & ((1), (2, 3), (4)), \\ & ((1), (2, 3, 4)), \\ & ((1, 2, 3), (4)), \\ & ((1, 2), (3), (4)), \\ & ((1), (2), (3), (4)), \\ & ((1), (2), (3, 4)), \\ & ((1, 2, 3, 4)), \\ & ((1, 2), (3, 4)) \}. \end{aligned}$$

601 For example, given a sequence  $ABCD$ , the first tuple in the set  $\mathbf{g}_1 = ((1), (2, 3), (4,))$   
 602 corresponds to linking three individual n-grams as  $((A), (B, C), (D))$ . The mappings  $\mathbf{g}_i$  in  $\mathbf{Z}$   
 603 differ in terms of how many links are required to encode the sequence: for example, the first  
 604 mapping comprises three links, the second two, and the fifth four. The probability of each  
 605 mapping is a product of it's individual link probabilities:

$$p(\mathbf{g}_i) = \prod_{j=1}^F p(l_j) = \eta^F, \quad (19)$$

606 where  $F$  is the number of links in the mapping  $\mathbf{g}_i$  and  $\eta$  is a probability of each link



607 which we assume to be constant (the reciprocal of the number of possible links). Such inverse  
 608 relationship between the probability of a mapping and its length captures the intuition that  
 609 complex mappings between multiple n-grams should be less likely than simple ones. Note that  
 610 for longer sequences a different relationship might be defined as the ability to combine chunks  
 611 is limited by human short term memory capacity which sets an effective limit to the length of  
 612 sequence that can be encoded [66, 67, 68].

For a particular model  $\theta_i$  the mapping parameter  $\mathbf{z}$  defines how n-grams are combined together to generate observed sequences. For example, consider two models and a set of sequences  $\mathbf{S} = \{ABCD, ABCD, CDAB\}$ . Both models use the same set of n-grams  $\mathbf{x} = \{AB, CD, A, B, C, D\}$ , but encode the observed sequences differently:

$$\mathbf{z}_1 = \{((A, B), (C, D)), ((A, B), (C, D)), ((C, D), (A, B))\}$$

$$\mathbf{z}_2 = \{((A), (B), (C), (D)), ((A), (B), (C), (D)), ((C), (D), (A), (B))\}$$

613 Although these two models are equally likely in terms of the chunks they employ, their  
 614 mappings have different probabilities. The probability of mappings defined by a particular  
 615 model is equal to the product of mappings for individual sequences:

$$p(\mathbf{z}|\theta_i) = \prod_{i=1}^M p(\mathbf{g}_i), \quad (20)$$

616 where  $M$  is the number of mappings (sequences encoded).

617 For any model  $\theta_i$  the probability of both parameters – n-grams and mappings – are assumed  
 618 to be independent of each other and therefore the probability of any particular model is the  
 619 product their parameter probabilities:

$$p(\mathbf{x}, \mathbf{z}|\theta_i) = \prod_{j=1}^J p(c_j) \prod_{i=1}^M p(\mathbf{g}_i), \quad (21)$$

620 where  $J$  and  $M$  are the number of n-grams and mappings. Therefore every model and its  
621 two parameters propose an encoding based on some chunks (e.g. examples above), which can  
622 subsequently compared to the observed data.

### 623 **Optimal chunking model**

624 The optimal model can be estimated by either randomly sampling the parameter distributions  
625 or using a systematic approach. Here we found the optimal model by only considering models  
626 that result in parsing the set of sequences into chunks and creating a ranking based on model  
627 evidence: see *Optimal chunking model estimation* in *Supplementary information* for details.  
628 Furthermore, we designed the experiment so that the only regularities between the sequences  
629 that could be encoded with common chunks arose from repeating the same two sequences: this  
630 ensured that we effectively knew the optimal model beforehand.

To recall, our task included 14 individual sequences made maximally dissimilar to each other with two of them repeated on 2/3 of the trials. We first presented the two repeating sequences 12 times each during the practice session immediately before the experiment. Since those two sequences shared no common bi-grams or tri-grams (see *Sequence generation and similarity*) the only efficient chunk encoding for the set of repetitions of those two sequences comprised just two four-item chunks (Fig 7A). Using 12 repetitions in the training session was enough to make the four-gram representation the most likely one (Fig 7B). Therefore at the start of the experiment (before the first trial  $t = 1$ ) the optimal chunking model had a set chunks defined as:

$$\mathbf{x}_{t=0}^{MAP} = \{CADB, DCBA\},$$

631 and a set of mappings  $\mathbf{z}_{t=0}^{MAP}$  where the set of 24 sequences (made up of just two individual  
632 sequences) were encoded with the same one-on-one mappings.

633 We proceeded to estimate the optimal chunking model at every trial  $t$  as the set of sequences  
634 was updated with newly observed stimulus. For this purpose we kept the statistical structure

**Fig 7: Optimal chunking model.** (A) Evidence for three alternative chunking models and their components at the beginning of the scanning experiment, when participants had seen the two repeating sequences 12 times each during the practice session. The three models use only single type n-grams: the 1-gram model encodes sequences using four single-item n-grams, 2-gram model with two bi-grams, and the 4-gram model with a single four-gram. The left panel shows the probability of the set of n-grams (code) each model specifies in terms of their negative log values. The centre panel shows the probability of their mappings (encoding) and the right panel the combination of the two into model evidence. The blue and red parts of the model evidence bar represent model code (n-grams) and encoding (mappings) probabilities in terms of their negative logs and the total length of the bar displays the model evidence as their sum. This allows intuitive visualisation of the code-encoding trade-off calculated by the Bayesian model comparison. The 4-gram model is the optimal model at the start of the experiment. (B) Model evidence across trials. X-axis shows the trial number and y-axis shows the log of model evidence. The optimal model is inferred at every trial; the 1-gram model encodes sequences only with four uni-grams, and the 4-gram model only uses four-grams. Note that at the beginning of the experiment the 4-gram model is equivalent to the optimal model: however, as new sequences are presented the optimal model encodes new data with shorter chunks (uni-grams) while the 4-gram model encodes new unique sequences with four-grams. Note that as new data is observed the evidence for any particular model decreases as the set of data becomes larger and the space of possible models increases exponentially. Also note that the log scale transforms the change of evidence over trials into linear form.

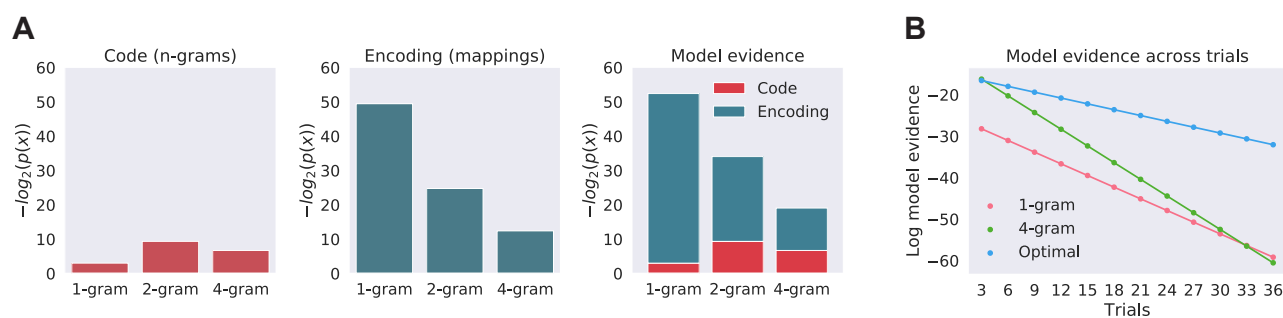

635 of the sequences fixed across the experiment: otherwise an optimal model on trial one would be  
 636 different to the one on the last trial. Therefore we organised the order of trials so that on the  
 637 average there was a single unique sequence and two repeating sequences in three consecutive  
 638 trials. This ensured that after every three trials the participant exposure to repeated and  
 639 unique sequences was roughly the same.

640 Since the unique sequences shared no significant statistical regularities with each other or  
 641 with the repeating sequences they could not have been efficiently encoded with common n-  
 642 grams ( $n > 1$ ). Therefore, at trial  $t = 1$  the optimal model to encode the previously seen  
 643 repeating sequences and the new unique one included the previously inferred two four-grams

644 and additionally four single item uni-grams:

$$\mathbf{x}_{t=1}^{MAP} = \{CADB, DCBA, A, B, C, D\}. \quad (22)$$

645 Since we kept the statistical structure of the sequences fixed across the experiment this  
646 ensured that the optimal model would remain the same for every trial across the experiment:  
647 on a trial when a repeating sequence was presented it was encoded with a single four-gram  
648 chunk, and when a unique sequence was presented it was encoded with four uni-grams, as  
649 shown on Fig 7B.

## 650 Representational similarity analysis (RSA)

### 651 Representational similarity analysis of fMRI activity patterns

652 First, we created a representational dissimilarity matrix (RDM)  $\mathbf{S}$  for the stimuli by calculating  
653 the pairwise distances  $s_{ij}$  between sequences  $\{N_1, \dots, N_M\}$ :

$$\mathbf{S} = \begin{bmatrix} s_{1,1} & \dots & s_{1,M} \\ \vdots & \ddots & \vdots \\ s_{M,1} & \dots & s_{M,M} \end{bmatrix},$$

$$s_{ij} = D(N_i, N_j)$$

654 where  $s_{ij}$  is the cell in the RDM  $\mathbf{S}$  in row  $i$  and column  $j$ , and  $N_i$  and  $N_j$  are individual sequences.  
655  $D(N_i, N_j)$  is the distance measure corresponding to any of the sequence representation models  
656 tested in this study:

- 657 1. The item-position model: Hamming distance (Eq 7)
- 658 2. The item-item model: bi-gram distance (Eq 9)
- 659 3. The item mixture model: the item mixture distance (Eq 11)
- 660 4. The optimal chunking model: n-gram distance (Eq 9) between the individual chunks

661 Next, we measured the pairwise distances between the voxel activity patterns:

$$\mathbf{A} = \begin{bmatrix} a_{1,1} & \dots & a_{1,M} \\ \vdots & \ddots & \vdots \\ a_{M,1} & \dots & a_{M,M} \end{bmatrix}, \quad (23)$$

$$a_{ij} = \text{cdist}(P_i, P_j) = 1 - \frac{(P_i - \mu_{P_i}) \cdot (P_j - \mu_{P_j})}{\| (P_i - \mu_{P_i}) \|_2 \| (P_j - \mu_{P_j}) \|_2} \quad (24)$$

662 where  $a_{ij}$  is the cell in the RDM  $\mathbf{A}$  in row  $i$  and column  $j$ , and  $P_i$  and  $P_j$  are voxel activity  
663 patterns corresponding to sequences  $N_i$  and  $N_j$ . As shown by Eq 24, the pairwise voxel pattern  
664 dissimilarity is calculated as a correlation distance.

665 We then computed the Spearman's rank-order correlation between the stimulus and voxel  
666 pattern RDMs for every task phase  $p$  and ROI  $r$ :

$$r_{r,p} = \rho(\mathbf{rS}_{r,p}, \mathbf{rA}_{r,p}) = \frac{\mathbb{E}[(\mathbf{rS}_{r,p} - \mu_{\mathbf{rS}_{r,p}})(\mathbf{rA}_{r,p} - \mu_{\mathbf{rA}_{r,p}})]}{\sigma_{\mathbf{rS}_{r,p}} \sigma_{\mathbf{rA}_{r,p}}} \quad (25)$$

667 where  $\rho$  is the Pearson correlation coefficient applied to the ranks  $\mathbf{rS}$  and  $\mathbf{rA}$  of data  $\mathbf{S}$  and  
668  $\mathbf{A}$ .

669 Finally, we tested whether the Spearman correlation coefficients  $r$  were significantly positive  
670 across participants (see *Significance testing* below). The steps of the analysis are outlined on  
671 Fig 3.

## 672 Noise ceiling estimation

673 Measurement noise in an fMRI experiment includes the physiological and neural noise in voxel  
674 activation patterns, fMRI measurement noise, and individual differences between subjects –  
675 even a perfect model would not result in a correlation of 1 with the voxel RDMs from each  
676 subject. Therefore an estimate of the noise ceiling is necessary to indicate how much variance  
677 in brain data – given the noise level – is expected to be explained by an ideal 'true' model.

678 We calculated the upper bound of the noise ceiling by finding the average correlation of each

679 individual single-subject voxel RDM (Eq 23, 24) with the group mean, where the group mean  
680 serves as a surrogate for the perfect model. Because the individual distance structure is also  
681 averaged into this group mean, this value slightly overestimates the true ceiling. As a lower  
682 bound, each individual RDM was also correlated with the group mean in which this individual  
683 was removed.

684 We also tested whether a model’s noise ceiling was significantly greater than zero. We first  
685 Fisher transformed individual Spearman’s rank-order correlation values and then performed a  
686 one-sided  $t$ -test for the mean being greater than zero. The 5% significance threshold for the  
687  $t$ -value was corrected for multiple comparisons as described in *Significance testing*. For more  
688 information about the noise ceiling see Nili et al. [36].

689 In sum, we only considered a model fit to be significant if it satisfied three criteria: (1) the  
690 model fit was significantly greater across participants than the lower bound of the noise ceiling,  
691 (2) the lower bound of the noise ceiling was significantly greater than zero across participants,  
692 and (3) the average fit for the item-mixture model (null-hypothesis) did not reach the noise  
693 ceiling.

## 694 **Associative learning predictions for RSA**

695 Associative learning makes two predictions: learning doesn’t change individual item represen-  
696 tations and learning reduces noise in sequence representations. These hypotheses can be tested  
697 by measuring the similarity between neural activation patterns elicited by novel and repeating  
698 sequences.

699 Noise in sequence representations can be estimated by assuming that the voxel pattern  
700 similarity  $\mathbf{A}$  (Eq 23) is a function of the ‘true’ representational similarity between sequences  $\mathbf{S}$   
701 plus some measurement and/or cognitive noise  $\nu$ :  $\mathbf{A} = \mathbf{S} + \nu$ . Here the noise  $\nu$  is the difference  
702 between predicted and measured similarity. Note that this is only a valid noise estimate when  
703 the predicted and measured similarity are significantly positively correlated (i.e. there is ‘signal’  
704 in the channel).

705 If learning reduces noise in sequence representations then the noise in activity patterns

706 generated by novel sequences  $\nu_N$  should be greater than for repeating sequences  $\nu_L$ . To test  
707 this we measured whether the activity patterns of repeating sequences were similar to novel  
708 sequences as predicted by the Hamming distance. The analysis followed exactly the same RSA  
709 steps as above, except instead of carrying it out within novel sequences we do this between  
710 novel and repeating sequences. First, we computed the Hamming distances between individual  
711 repeating and novel sequences  $\mathbf{S}_{U,R}$ , next the corresponding voxel pattern similarities  $\mathbf{A}_{U,R}$  and  
712 finally computed the Spearman's rank-order correlation between the stimulus and voxel pattern  
713 RDMs exactly as above (Eq 25). If this measured correlation is significantly greater than the  
714 one within novel sequences ( $r_{U,R} > r_U$ ) across participants, it follows that the noise level in  
715 repeating representations is lower than in novel representations. This analysis was carried out  
716 for all task phases and in all ROIs and the outcome could fall into one of three categories:

- 717 1. No significant correlation: the probability of  $r_{U,R}$  is less than the significance threshold  
718 ( $p < 10^{-4}$ ; see *Significance testing* below). This means that repeating sequences are not  
719 represented as item-position associations in this ROI and hence the test for noise levels  
720 is meaningless.
- 721 2. Significant correlation, but consistently smaller across participants than the within-novel  
722 sequences measure:  $r_{U,R} < r_U$ . repeating sequence representations are noisier than novel  
723 sequence representations.
- 724 3. Significant correlation, but consistently greater across participants than the within-novel  
725 sequences measure:  $r_{U,R} > r_U$ . repeating sequence representations are less noisy than  
726 novel sequence representations.

727 To confirm that our assumptions regarding the effects of noise on sequence representation  
728 were correct we estimated the fMRI measurement noise for the participants in our task and  
729 tested to what degree the noise should be reduced (or signal-to-noise ratio increased) in the  
730 fMRI patterns for the changes to be detectable with the representational similarity analysis.  
731 The details of these simulation can be found in *Simulation of expected changes in pattern*  
732 *similarity* in *Supplementary information*.

## 733 **Recoding predictions for RSA**

734 The recoding model predicts that the repetition of individual sequences should recode individual  
735 associations of those sequences. We assumed that participants were ideal learners and inferred  
736 an optimal chunking model based on the statistics across previously seen sequences (Eq 22). See  
737 the *Chunking model* and *Optimal chunking model* sections for estimation details. Importantly,  
738 we designed the presentation of repeating and novel sequences so that the optimal model would  
739 remain the same for every trial across the experiment: every repeating sequence was encoded  
740 with a single four-gram chunk, and every novel sequence with four uni-grams ( Fig 4, bottom  
741 row). For every participant we then estimated an RDM predicting the distances across novel  
742 and repeating sequences using the n-gram distance method described above (Eq 9). First, we  
743 computed the n-gram distances between individual repeating and novel sequences  $\mathbf{S}_{U,R}$ , next the  
744 corresponding voxel pattern similarities  $\mathbf{A}_{U,R}$  and finally computed the Spearman's rank-order  
745 correlation between the stimulus and voxel pattern RDMs exactly as above (Eq 25).

## 746 **Model-free fMRI analyses of learning effects**

747 All analyses were carried out with pre-processed data as detailed in the *Functional data pre-*  
748 *processing* section.

## 749 **Changes in pattern distances across the experiment**

### 750 *Between two repeating sequences*

751 We computed voxel pattern distance between each of the  $N$ th repetition of the two repeat-  
752 ing sequences and estimated a slope across repetitions (least squares linear regression) to see  
753 whether there was a significant change in distance across trials. The figure below displays this  
754 for a single participant and region:  $y$ -axis displays the distance value, while  $x$ -axis the trial  
755 number. For example, the data point at  $x = 1$  represents the distance between two individual  
756 repeated sequences  $R_1$  and  $R_2$  at their first presentation, and all 12 data points are calculated  
757 as:



$$d_{x=1} = distance(R_1^1, R_2^1),$$

...

$$d_{x=12} = distance(R_1^{12}, R_2^{12})$$

where superscript denotes the repetition number and subscript the identity of the sequences.

In all distance analyses we used the cosine distance between two patterns  $u$  and  $v$  defined as:

$$distance(u, v) = 1 - \frac{u \cdot v}{\|u\|_2 \|v\|_2}$$

**Fig 8: Change in pattern distance across trials for a single participant and region.** Y-axis displays the distance value, while x-axis the trial number.

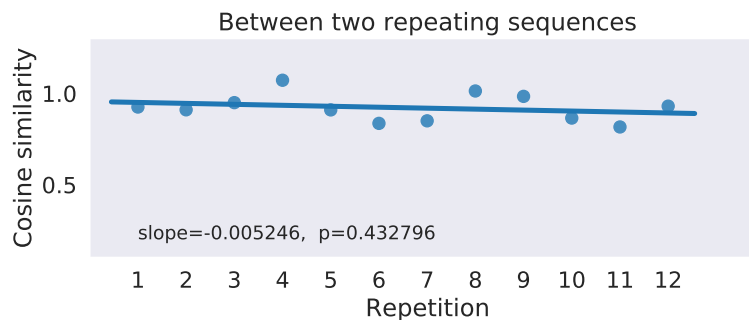

758 We then tested whether the participants' slope values were significantly different from zero  
 759 for all ROIs. The significance threshold was  $\alpha = 0.05/(\text{Number of ROIs})$ .

760 *Within repeating sequences*

761 We measured whether voxel pattern distances within the individual two repeating sequences  
 762 changed significantly across the experiment. This test measured whether there was a change  
 763 in distances between consecutive presentations of the same individual repeated sequence:

$$d_n = distance(R^n, R^{n-1}).$$

764 As with the previous analysis, the participants' individual slopes – averaged across the two  
765 repeating sequences – were included in the group level  $t$ -test for every ROI.

766 *Between the two repeating sequences and the unique sequences*

767 We tested whether the distance between  $N$ -th repetition of the repeating sequence  $R_i$  and  
768 the twelve unique sequences  $U_1, \dots, U_{12}$  changed significantly across the experiment.

$$d_n = \mathbf{E}[\text{distance}(R_i^n, U_1), \dots, \text{distance}(R_i^n, U_{12})].$$

769 *Within unique sequences*

770 We tested whether there was a change in pattern distances across successive presentations  
771 of individual unique sequences.

$$d_n = \text{distance}(U^n, U^{n-1}).$$

## 772 **Behavioural measures**

773 Significant differences in behavioural measures across participants were evaluated with a  $t$ -test  
774 for dependent measures. We chose not to inverse-transform reaction time data following recent  
775 advice by Schramm and Rouder [69] (see also Baayen and Milin [70]).

## 776 **fMRI data acquisition and pre-processing**

### 777 **Acquisition**

778 Participants were scanned at the Medical Research Council Cognition and Brain Sciences Unit  
779 (Cambridge, UK) on a 3T Siemens Prisma MRI scanner using a 32-channel head coil and  
780 simultaneous multi-slice data acquisition. Functional images were collected using 32 slices

781 covering the whole brain (slice thickness 2 mm, in-plane resolution 2×2 mm) with acquisi-  
782 tion time of 1.206 seconds, echo time of 30ms, and flip angle of 74 degrees. In addition,  
783 high-resolution MPRAGE structural images were acquired at 1mm isotropic resolution. (See  
784 <http://imaging.mrc-cbu.cam.ac.uk/imaging/ImagingSequences> for detailed information.) Each  
785 participant performed two scanning runs and 510 scans were acquired per run. The initial ten  
786 volumes from the run were discarded to allow for T1 equilibration effects. Stimulus presentation  
787 was controlled by PsychToolbox software [71]. The trials were rear projected onto a translucent  
788 screen outside the bore of the magnet and viewed via a mirror system attached to the head  
789 coil.

### 790 **Anatomical data pre-processing**

791 All fMRI data were pre-processed using *fMRIPrep* 1.1.7 [72, 73], which is based on *Nipype*  
792 1.1.3 [74, 75]. The T1-weighted (T1w) image was corrected for intensity non-uniformity (INU)  
793 using *N4BiasFieldCorrection* [76, ANTs 2.2.0], and used as T1w-reference throughout the  
794 workflow. The T1w-reference was then skull-stripped using *antsBrainExtraction.sh* (ANTs  
795 2.2.0), using OASIS as target template. Brain surfaces were reconstructed using *recon-all*  
796 [77, FreeSurfer 6.0.1], and the brain mask estimated previously was refined with a custom  
797 variation of the method to reconcile ANTs-derived and FreeSurfer-derived segmentations of  
798 the cortical grey-matter of Mindboggle [78]. Spatial normalisation to the ICBM 152 Nonlinear  
799 Asymmetrical template version 2009c [79] was performed through nonlinear registration with  
800 *antsRegistration* [80, ANTs 2.2.0], using brain-extracted versions of both T1w volume and  
801 template. Brain tissue segmentation of cerebrospinal fluid (CSF), white-matter (WM) and  
802 grey-matter (GM) was performed on the brain-extracted T1w using *fast* [81, FSL 5.0.9].

### 803 **Functional data pre-processing**

804 The BOLD reference volume was co-registered to the T1w reference using *bbregister* (FreeSurfer)  
805 using boundary-based registration [82]. Co-registration was configured with nine degrees of  
806 freedom to account for distortions remaining in the BOLD reference. Head-motion parameters

807 with respect to the BOLD reference (transformation matrices and six corresponding rotation  
808 and translation parameters) were estimated using `mcflirt` [83, FSL 5.0.9]. The BOLD time-  
809 series were slice-time corrected using `3dTshift` from AFNI [84] package and then resampled  
810 onto their original, native space by applying a single, composite transform to correct for head  
811 motion and susceptibility distortions. Finally, the time-series were resampled to the MNI152  
812 standard space (ICBM 152 Nonlinear Asymmetrical template version 2009c, Fonov et al. [79])  
813 with a single interpolation step including head-motion transformation, susceptibility distortion  
814 correction, and co-registrations to anatomical and template spaces. Volumetric resampling  
815 was performed using `antsApplyTransforms` (ANTs), configured with Lanczos interpolation to  
816 minimise the smoothing effects of other kernels [85]. Surface resamplings were performed using  
817 `mri_vol2surf` (FreeSurfer).

818 Three participants were excluded from the study because more than 10% of the acquired  
819 volumes had extreme inter-scan movements (defined as inter-scan movement which exceeded a  
820 translation threshold of 0.5mm, rotation threshold of 1.33 degrees and between-images difference  
821 threshold of 0.035 calculated by dividing the summed squared difference of consecutive images  
822 by the squared global mean).

## 823 **fMRI event regressors**

824 To study sequence-based pattern similarity across all task phases we modelled the presentation,  
825 delay, and response phases of every trial (Fig 2A) as separate event regressors in the general  
826 linear model (GLM). We fitted a separate GLM for every event of interest by using an event-  
827 specific design matrix to obtain each event's estimate including a regressor for that event as  
828 well as another regressor for all other events (LS-S approach in Mumford et al. [86]). Besides  
829 event regressors, we added six head motion movement parameters and additional scan-specific  
830 noise regressors to the GLM (see *Functional data pre-processing* above). The regressors were  
831 convolved with the canonical hemodynamic response (as defined by SPM12 analysis package)  
832 and passed through a high-pass filter (128 seconds) to remove low-frequency noise. This process  
833 generated parameter estimates (beta-values) representing every trial's task phases for every

834 voxel.

835 We segmented each participants' grey matter voxels into anatomically defined regions of  
836 interest (ROI,  $n = 74$ ). These regions were specified by the Destrieux et al. [87] brain atlas and  
837 automatically identified and segmented for each participant using `mri_annotation2label` and  
838 `mri_label2vol` (FreeSurfer).

## 839 **Univariate analysis of novel vs. learned sequences**

840 Voxel-wise effects were controlled for multiple comparisons using the family-wise error rate as  
841 implemented in the SPM-12 package.

## 842 **Significance testing**

843 We carried out the representational similarity analysis for every task phase (encoding, delay,  
844 response;  $n = 3$ ) and ROI ( $n = 74$  for RSA). To test whether the results were significantly dif-  
845 ferent from chance across participants we used bootstrap sampling to create a null-distribution  
846 for every result and looked up the percentile for the observed result. We considered a result to  
847 be significant if it had a probability of  $p < \alpha$  under the null distribution: this threshold  $\alpha$  was  
848 derived by correcting an initial 5% threshold with the number of ROIs and task phases so that  
849 for RSA  $\alpha = 0.05/74/3 \approx 10^{-4}$  and for classification  $\alpha = 0.05/9/3 \approx 10^{-3}$ .

850 We next shuffled the sequence labels randomly to compute 1000 mean RSA correlation  
851 coefficients (Eq 25). To this permuted distribution we added the score obtained with the  
852 correct labelling. We then obtained the distribution of group-level (across participants) mean  
853 scores by randomly sampling mean scores (with replacement) from each participant's permuted  
854 distribution. The number of random samples for the group mean distribution was dependent on  
855 the significant probability threshold: we took  $n = 10/\alpha$  samples so that the number of samples  
856 was always an order of magnitude greater than the required resolution for the group chance  
857 distribution. Next, we found the true group-level mean score's empirical probability based on  
858 its place in a rank ordering of this distribution.

## 859 **Replication of analysis**

860 The analysis scripts required to replicate the analysis of the fMRI data and all figures and  
861 tables presented in this paper are available at: [https://gitlab.com/kristjankalm/fmri\\_seq\\_ltm](https://gitlab.com/kristjankalm/fmri_seq_ltm).

862 The MRI data and participants' responses required to run the analyses are available in  
863 BIDS format at: <https://www.mrc-cbu.cam.ac.uk/publications/opendata/>.

## 864 **Acknowledgements**

865 We would like to thank Jane Hall, Marta Correia, and Marius Mada for their assistance in  
866 setting up the experiments and collecting data. This research was supported by the Medical  
867 Research Council UK (SUAG/012/RG91365).

## 868 **1 Supplementary information**

### 869 **1.1 Neural representation of novel sequences**

870 Novel sequences were represented as item-position associations in eight regions in the dorsal  
871 visual processing stream (Fig 9, Table 2). Evidence for item-position associations exceeded the  
872 noise ceiling all of those regions. The noise ceiling gives theoretical lower and upper bounds of  
873 the possible model fit given the noise in the data: any representational model which does not  
874 reach the noise ceiling should not be considered as a plausible explanation of voxel responses  
875 (see *Noise ceiling estimation* in *Methods*). We also defined an additional representational model  
876 for the RSA which tested for a null-hypothesis that instead of sequence representations neural  
877 activity could be better explained by the superposition of patterns for constituent individual  
878 items in the sequence, called the *item mixture model* (see e.g. Yokoi et al. [22]). The item  
879 mixture model reached the noise ceiling in six tested regions (displayed in italics in Table 2).  
880 Since we cannot rule out the possibility that the regions where the item mixture model reached  
881 the noise ceiling are not engaged in item rather than sequence representation we excluded those  
882 ROIs from further analysis.

883 In sum, the analysis of novel sequence representation shows that only the item-position  
884 model is a plausible fit to neural sequence representations in the dorsal visual processing stream.  
885 Our findings are in line with previous research that novel sequences are initially encoded in terms  
886 of associations between items and their temporal positions in both animal [38, 63, 62, 88] and  
887 human cortex [89, 41, 90].

### 888 **1.2 Item mixture model parameters**

889 There are a number of meaningful ways individual items could contribute to the mixture.  
890 Although we have chosen a 'recency mixture' where the most recent item contributes the  
891 most, we could have also used a 'primacy mixture' with exactly the opposite slope of mixture  
892 contributions. The reason we only tested for the 'recency mixture' is that both recency and  
893 primacy models predict the same similarity between individual sequences in our task. In other

**Table 2: Evidence for the representation of novel sequences.** Anatomical region suffixes indicate gyrus (G) or sulcus (S). Asterisks (\*) represent the item-position model and daggers (†) the item mixture model reaching the lower bound of the noise ceiling. The lower noise ceilings were significantly greater than zero for all regions displayed in the table ( $df = 21, p < 10^{-3}$ ). Regions in which the item mixture model reached the noise ceiling in any of the task phases are displayed in italics.

| Lobe      | Name                                    | Presentation | Delay | Recall |
|-----------|-----------------------------------------|--------------|-------|--------|
| Frontal   | Central S                               |              | *     | *      |
| Frontal   | <i>Frontal Middle G</i>                 | *            | *,†   | †      |
| Occipital | <i>Calcarine S</i>                      | *,†          | *     | †      |
| Occipital | Occipital Inferior G S                  |              |       | *      |
| Occipital | <i>Occipital Middle G</i>               | *            | *,†   |        |
| Occipital | Occipital Middle Lunatus S              | *            |       |        |
| Occipital | <i>Occipital Superior G</i>             | *            | †     | *,†    |
| Occipital | <i>Occipital Superior Transversal S</i> | *,†          |       | *      |
| Parietal  | Intraparietal Postero-Transversal S     |              |       | *      |
| Parietal  | <i>Parietal Inferior-Angular G</i>      |              | *,†   | *      |
| Parietal  | Parietal Inferior-Supramarginal G       | *            |       |        |
| Parietal  | Postcentral G                           | *            | *     |        |
| Parietal  | Postcentral S                           | *            |       |        |
| Temporal  | Temporal Superior S                     |              |       | *      |

894 words, a representational dissimilarity matrix (RDM, Eq 23) derived with a recency-based item  
 895 mixture predicts the same similarity between voxel patterns as an RDM derived with a primacy  
 896 based mixture (if the absolute value of the gradient slope remains the same). For a detailed  
 897 explanation see the example below.

898 We could have chosen any of the infinite slope values across positions. However we chose  
 899 a middle point between two extreme slope values: all the mixtures become the same when  
 900 the slope is horizontally flat and only a single item contributes when the slope is vertical.  
 901 We could have obtained an estimate of the coefficients from analysing the individual finger  
 902 movement representations since the mapping between items and fingers was randomised across  
 903 the participants. However, here our focus was on sequence representations and therefore we  
 904 felt a null hypothesis representing an average in the space of possible mixtures was enough.

#### 905 *Worked example*

906 We assume a recency mixture model where contributions increase with sequence position



**Fig 9: Novel sequence representation in the dorsal visual processing stream.** We tested for three possible sequence representations models: item-position associations (IP), item-item associations (II), and a null-hypothesis of item mixtures (IM). The bar plots show fits to those three models, that is, how well each model predicted the distance between pairs of voxel activity patterns corresponding to individual novel sequences. Y-axis displays the model fit in terms of participants' average Spearman's rank-order correlation, error bars represent the standard error of the mean (SEM). Dashed lines in bar plots represent the lower and upper bounds of the noise ceiling. This was done separately for all three task phases (presentation, delay, response; Fig 2). Red asterisks mark regions and task phases where the fit with the item-position model was significantly greater than the noise ceiling and compared to the item mixture model ( $df = 21, p < 10^{-3}$ ), and the item mixture model did not reach the noise ceiling. In all displayed plots the lower noise ceilings were significantly greater than zero across participants.

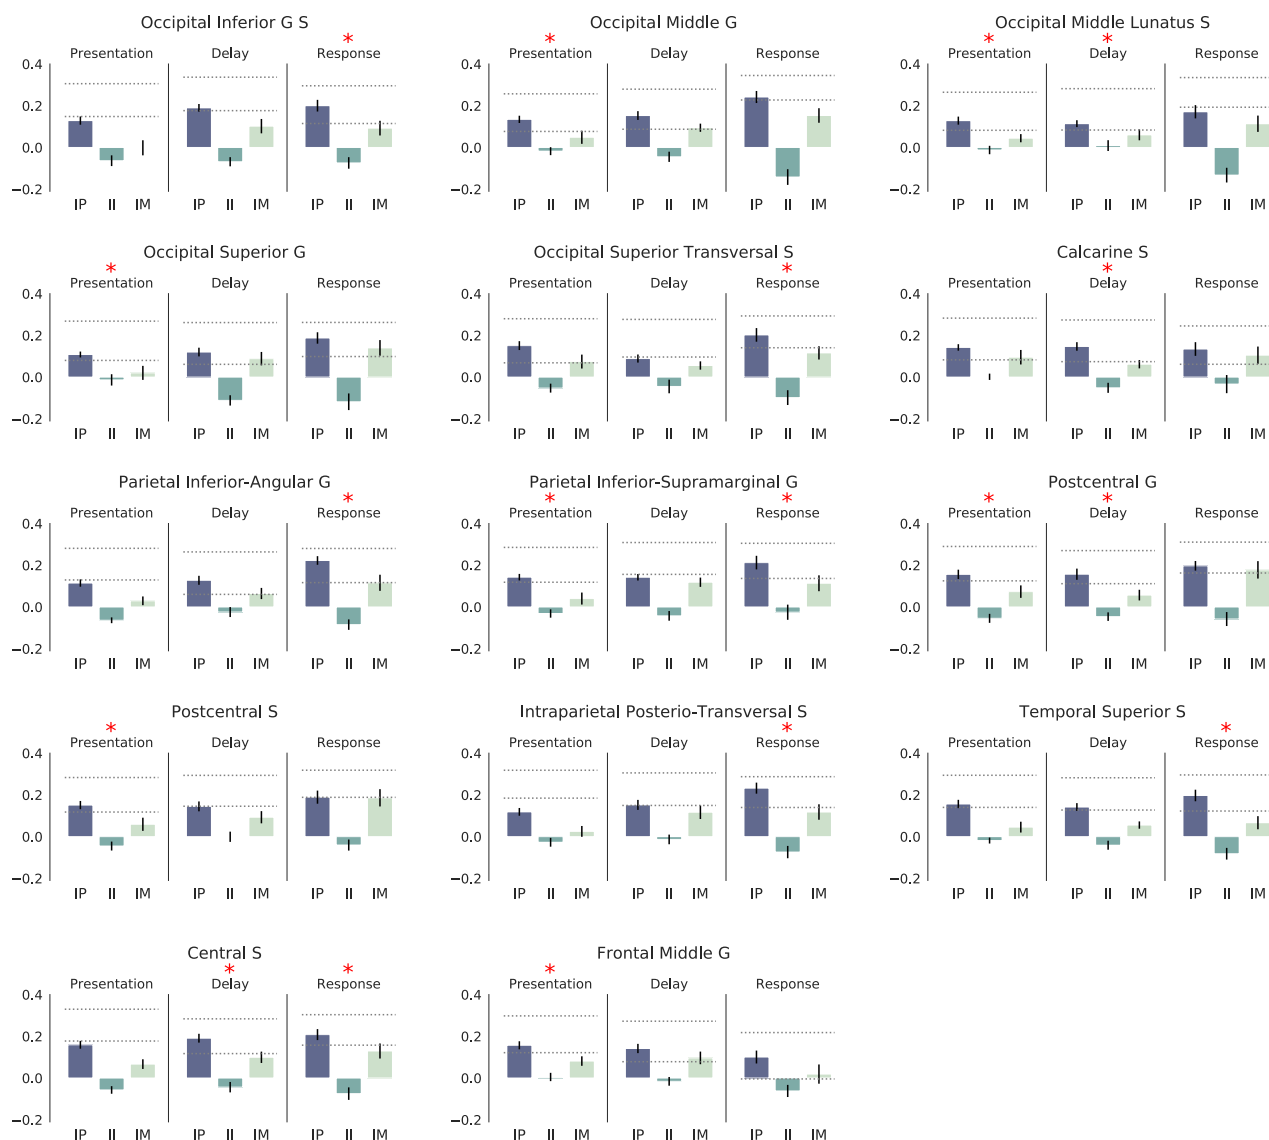

907 as  $\beta = [0, 1/6, 1/3, 1/2]$ , then we can represent a sequence as an item mixture in our task by  
 908 indicating the proportion of each four items  $[A, B, C, D]$  in the mixture, e.g.:  $[C, A, D, B]$  as

909  $[A : 1/6, B : 1/2, C : 0, D : 1/3]$ ,  $[B, D, C, A]$  as  $[A : 1/3, B : 0, C : 1/6, D : 1/2]$  and so forth.

910 Given that item representations do not change from sequence to sequence and hence all mixtures  
911 would be equal if the coefficients  $\beta$  were equal across all items (e.g. uniformly  $1/4$ ) the distances  
912 between the resulting mixture representations are determined by the vector of coefficients. For  
913 example, the euclidean distance between  $[A, B, C, D]$  and  $[C, A, D, B]$  as mixtures (given  $\beta =$   
914  $[0, 1/6, 1/3, 1/2]$ ) is the euclidean distance between the two four-dimensional mixture vectors:

$$915 \quad d = \text{EuclideanDist}([1/6, 1/2, 0, 1/3], [1/3, 0, 1/6, 1/2])$$

916 Assuming the gradient  $\beta$  has always the same number of unique values then the distance  
917 between such 4D points depends only on the absolute value of the gradient slope and not the  
918 direction of it (positive or negative slope). This should be evident when one considers that in  
919 our task all sequences have always exactly the same four items and hence mixture contributions  
920 are directly proportional to the ordering of the same four items.

921 For a simulation how the mixture model similarity prediction does not depend on the direc-  
922 tion of the slope (recency vs primacy) see the Jupyter Notebook (*model\_mixture*) at our code  
923 repository.

### 924 **1.3 Optimal chunking model estimation**

#### 925 **Model fit**

In Bayesian inference the model fit is defined by the likelihood function which evaluates how likely is that the observed data was generated by a particular model – in our case:

$$p(\mathbf{S}|\theta_i) = p(\mathbf{S}|\mathbf{z}, \mathbf{x}, \theta_i),$$

926 where  $\mathbf{x}$  is a set of n-grams and  $\mathbf{z}$  is a set of discrete mappings which define how individual  
927 n-grams are combined to encode the observed data  $\mathbf{S}$ . Intuitively, the likelihood of a model  $\theta_i$   
928 quantifies how easy or difficult it is to generate all observed sequences using a set of n-grams  
929 and mappings as specified by the model.

930 Commonly, the likelihood of a model is measured in terms of the distance between model

931 predictions and the observed data: for example, we could use a between-sequence distance  
932 metric (such as the Levenshtein or Hamming distance) to compute the distances between the  
933 observed sequences  $\mathbf{S}$  and the set of sequences defined by a particular model's parameters (n-  
934 grams and mappings). However, here we only consider models that are capable of encoding the  
935 observed data: e.g. for a set of two sequences  $\mathbf{S} = \{ABCD, DBAC\}$  we only consider chunks  
936 like  $\mathbf{x} = \{AB, CD\}$  or  $\mathbf{x} = \{A, B, C, D\}$ , but not  $\mathbf{x} = \{CA, DD\}$ ; and the same with map-  
937 pings. There are two reasons for this: first, the space of possible models that correctly encode  
938 the observed sequences is already quite large. For example, in our study we use 14 individual  
939 sequences. As any individual 4-item sequence can be encoded with 8 different mappings (see  
940 *Chunking model* above), it follows that a set of 14 sequences can be encoded with  $8^{14}$  different  
941 mappings. Similar combinatorial expansion applies for the number of possible sets of n-grams.  
942 Second, the models that cannot even theoretically fit the data are inevitably less likely than  
943 models which do. Therefore by constraining ourselves to the subspace of data-matching models  
944 we explore the domain of most probable models. This constraint also follows an ecological ra-  
945 tionale: chunks are assumed to be inferred from the regularities present in the data, hence there  
946 is no reason to consider latent variables that cannot be mapped onto the observed variables.

## 947 **Model evidence**

948 Model evidence (Eq 16) combines previously described measures: model complexity in terms  
949 of the probabilities of its parameters and model fit. Here we only consider models which fit the  
950 observed data perfectly: evaluating model evidence is therefore reduced to estimating model  
951 complexity for data-fitting models. The model with greatest evidence – and therefore the one  
952 with maximum a posterior probability – is the one which encodes the set of observed sequences  
953 with the least complex model.

954 Importantly, the two model parameters – set of n-grams and mappings – make contrasting  
955 contributions to model complexity: an optimal model will need to find a trade-off between the  
956 number of n-grams it comprises and the complexity of the mappings. For example, a set of  
957 four individual uni-grams  $\mathbf{x} = \{A, B, C, D\}$  can encode any of the 14 sequences in our task,

958 but all of the mappings need to be maximally complex, each involving four links between the  
959 n-grams. Such a model would have a simple set of chunks but would require complex mappings  
960 to encode the observed sequences. In the other extreme, consider a model where each individual  
961 sequence is encoded with a single four-gram and therefore would require simple mappings (each  
962 n-gram to each individual sequence, i.e. four times less complex per sequence than the uni-gram  
963 model). However, the such a set of 14 four-grams is by definition more complex and therefore  
964 less probable than a set of four simple uni-grams.

965 The two model parameters – set of n-grams and mappings – can therefore be intuitively  
966 thought of as the model’s *codes* and the *encoding* it specifies. The Bayesian model comparison  
967 mechanism guarantees that the model with the greatest evidence – the optimal model – will  
968 define an ideal trade-off between the complexity of the codes and the encoding it produces.  
969 This trade-off can be visualised by displaying the model evidence as a sum of their negative log  
970 probabilities: Fig 7B illustrates the trade-off between the codes and the encoding for several  
971 possible chunking models given a set of two repeated sequences.

## 972 **1.4 Simulation of expected changes in pattern similarity**

973 Our hypothesis about the effects of associative learning assumes noise reduction directly at  
974 the level of representational dissimilarity matrix (RDM, Eq 23). Diedrichsen et al. [91] have  
975 pointed out that as most distance estimates are based on the product of random variables,  
976 the resultant noise variance in the distance estimates gets more complicated than the model  
977 we have assumed here. To address this issue we investigated the degree to which the noise  
978 should be reduced (or SNR to be increased) in the learned pattern in order for the changes  
979 to be detectable in the RDM. Specifically, we carried out a series of simulations to assess how  
980 pattern similarity distances change according to the reduction of noise in the activity patterns  
981 for the learned sequences. For example, when the measurement noise is already high, a certain  
982 amount of noise-reduction in learned sequences would not be visible in the estimated distance  
983 measures.

984 We simulated the predicted effects of associative learning which assume that (1) neural

985 sequence representations remain the same with learning but (2) their SNR changes proportional  
986 to the SNR change observed in the behavioural responses. Therefore such change should also  
987 be detected in the fMRI data.

988 Briefly, we first transformed the behavioural change accompanying sequence learning (sig-  
989 nificant reduction in manual response times, see *Behaviour* in the *Results* section of the main  
990 manuscript) into the change in the internal representations of sequences. Formally, we assumed  
991 that manual response times are proportional to noise in the representation distribution: as  
992 noise increases so do the response times. This leads to two representational noise estimates  
993 for both unique and repeated sequences which were then transformed into expected voxel re-  
994 sponses. The simulated voxel responses were then combined with the estimated fMRI noise  
995 using the data from the study's pilot scans. This was carried out using the *CNR/Noise\_SD*  
996 approach outlined in [92]. The simulated fMRI data was then transformed into voxel RDMs  
997 and correlated with stimulus RDMs. Briefly, the steps were as follows:

- 998 1. Estimation of population responses according to the sequence representation model given  
999 some estimate of the representational noise.
- 1000 2. Estimation of fMRI noise from unprocessed EPI scans per subject.
- 1001 3. Combination of simulated population responses with the estimated fMRI noise, resulting  
1002 in simulated fMRI responses to individual sequences. This step was carried out using the  
1003 approach and scripts developed by [93], building on previous work by [92].
- 1004 4. RSA simulation: RSA carried out as described in *Methods* over simulated fMRI data to  
1005 estimate a relationship between representational noise and the noise in RDMs.

1006 The full technical details and results of the simulation are presented in the Jupyter Notebook  
1007 (*sim\_fmri*) at our code repository.

1008 The simulation results are displayed in the plot below outlining the change in the RSA  
1009 correlation values as a function of representational and measurement (fMRI) noise.

1010 Our simulation shows that we can indeed expect to see a correspondence between represen-  
1011 tational noise and RSA correlation values as assumed by the SNR hypothesis: RSA correlation

**Fig 10:** Y-axis shows the correlation between stimulus RDM and voxel RDM (Spearman's  $\rho$ ) and X-axis shows the amount of noise in the representational model (as represented by the  $\sigma$  noise parameter).

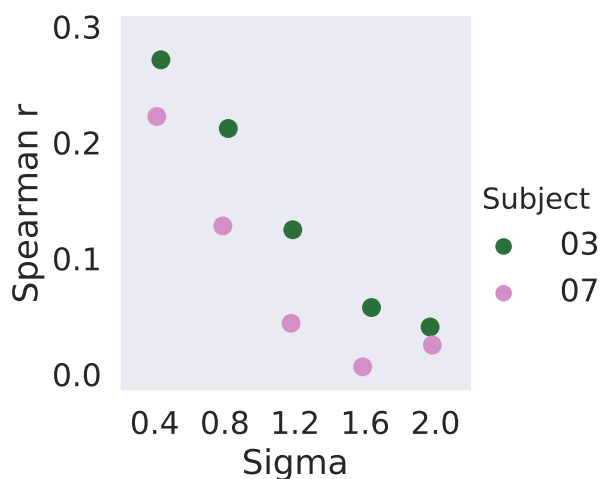

1012 values decrease as noise in the sequence representations increases. The individual points on  
1013 the figure above represent two different fMRI noise estimates corresponding to two subjects  
1014 we scanned in the piloting phase. The difference between the first two noise parameter values  
1015 ( $\sigma = 0.4$  and  $\sigma = 0.8$ ) corresponds to the estimated noise difference in the novel and learned  
1016 sequence representations.

## 1017 1.5 Associative learning of overlapping sequences

### 1018 *Worked example*

1019 To continue with the example provided in the manuscript: "The sequences ABCD and  
1020 BADC cannot be learned simultaneously simply by storing position-item associations, as the  
1021 resulting set of associations would be equally consistent with the unlearned sequence ABDC."

1022 When two sequences ABCD and BADC are learned by strengthening item-position asso-  
1023 ciations then (all other variables remaining the same) we end up with equal strengths for the  
1024 following item-position associations:

$A - 1,$

$A - 2,$

$B - 1,$

$B - 2,$

$C - 3,$

$C - 4,$

$D - 3,$

$D - 4.$

1025 The resulting weights would also be the result of learning two different sequences ABDC  
1026 and BACD. In other words, learning the two original sequences would result in eight association  
1027 weights of equal strength to represent four sequences (ABCD, BADC and ABDC, BACD). Such  
1028 a learning mechanism would suffer from catastrophic interference with multiple short sequences  
1029 of overlapping items (like most real-word sequential actions tend to be).

## 1030 **1.6 Individual sequences used in the task**

1031 Four individual items (Gabor patches) are represented with numbers 1 to 4.

(3, 1, 4, 2)

(2, 4, 1, 3)

(1, 2, 3, 4)

(4, 2, 1, 3)

(1, 4, 2, 3)

(4, 3, 1, 2)

(4, 1, 3, 2)

(4, 2, 3, 1)

(1, 3, 2, 4)

(1, 2, 4, 3)

(4, 1, 2, 3)

(1, 4, 3, 2)

(1, 3, 4, 2)

(4, 3, 2, 1)



## 1032 References

- 1033 [1] Stanislas Dehaene, Florent Meyniel, Catherine Wacongne, Liping Wang, and Christophe  
1034 Pallier. The Neural Representation of Sequences: From Transition Probabili-  
1035 ties to Algebraic Patterns and Linguistic Trees. *Neuron*, 88(1):2–19, 2015. doi:  
1036 10.1016/j.neuron.2015.09.019.
- 1037 [2] James H. Howard, Darlene V. Howard, Karin C. Japikse, and Guinevere F. Eden.  
1038 Dyslexics are impaired on implicit higher-order sequence learning, but not on im-  
1039 plicit spatial context learning. *Neuropsychologia*, 44(7):1131–1144, 2006. doi:  
1040 10.1016/j.neuropsychologia.2005.10.015.
- 1041 [3] Delphine Lassus-Sangosse, Marie-Ange N’guyen-Morel, and Sylviane Valdois. Sequential  
1042 or simultaneous visual processing deficit in developmental dyslexia? *Vision Research*, 48  
1043 (8):979–988, 2008. doi: 10.1016/j.visres.2008.01.025.
- 1044 [4] Arnaud Szmalec, Maaike Loncke, Mike Page, and Wouter Duyck. Order or disorder? im-  
1045 paired hebb learning in dyslexia. *Journal of Experimental Psychology: Learning, Memory,*  
1046 *and Cognition*, 37(5):1270, 2011.
- 1047 [5] J Fiser, P Berkes, G Orbán, and M Lengyel. Statistically optimal perception and learning:  
1048 from behavior to neural representations. *Trends in Cognitive Sciences*, 14(3):119–30, 2010.  
1049 doi: 10.1016/j.tics.2010.01.003.
- 1050 [6] Alexandre Pouget, Jeffrey M Beck, Wei Ji Ma, and Peter E Latham. Probabilistic brains:  
1051 knowns and unknowns. *Nature neuroscience*, 16(9):1170–8, 2013. doi: 10.1038/nn.3495.
- 1052 [7] Sharon Goldwater, Thomas L. Griffiths, and Mark Johnson. A Bayesian framework for  
1053 word segmentation: Exploring the effects of context. *Cognition*, 112(1):21–54, 2009. doi:  
1054 10.1016/j.cognition.2009.03.008.
- 1055 [8] M Frank, S Goldwater, T Griffiths, and J Tenenbaum. Modeling human per-

- 1056 formance in statistical word segmentation. *Cognition*, 117(2):107–125, 2010. doi:  
1057 10.1016/j.cognition.2010.07.005.
- 1058 [9] J Fiser and R N Aslin. Unsupervised statistical learning of higher-order spatial structures  
1059 from visual scenes. *Psychological science*, 12(6):499–504, 2001.
- 1060 [10] G Orban, J Fiser, R. N. Aslin, and M Lengyel. Bayesian learning of visual chunks by  
1061 human observers. *Proceedings of the National Academy of Sciences*, 105(7):2745–2750,  
1062 2008. doi: 10.1073/pnas.0708424105.
- 1063 [11] J Fiser. Perceptual learning and representational learning in humans and animals.  
1064 *Learning & behavior : a Psychonomic Society publication*, 37(2):141–53, 2009. doi:  
1065 10.3758/lb.37.2.141.
- 1066 [12] V Bejjanki, J Beck, Z Lu, and A Pouget. Perceptual learning as improved probabilis-  
1067 tic inference in early sensory areas. *Nature Neuroscience*, 14(5):642–648, 2011. doi:  
1068 10.1038/nn.2796.
- 1069 [13] B Lake, R Salakhutdinov, and J Tenenbaum. Human-level concept learning through  
1070 probabilistic program induction. *Science*, 350(6266):1332–1338, 2015. doi: 10.1126/sci-  
1071 ence.aab3050.
- 1072 [14] Konrad P. Körding and Daniel M. Wolpert. Bayesian integration in sensorimotor learning.  
1073 *Nature*, 427(6971):244–247, 2004. doi: 10.1038/nature02169.
- 1074 [15] Emanuel Todorov. Optimality principles in sensorimotor control. *Nature Neuroscience*, 7  
1075 (9):907–915, 2004. doi: 10.1038/nm1309.
- 1076 [16] F Gobet, P Lane, S Croker, P Cheng, G Jones, I Oliver, and J Pine. Chunking mechanisms  
1077 in Human Learning. *Trends in Cognitive Sciences*, 5(6):236–243, 2001.
- 1078 [17] Fernand Gobet, Martyn Lloyd-Kelly, and Peter C. R. Lane. What’s in a Name? The  
1079 Multiple Meanings of “Chunk” and “Chunking”. *Frontiers in Psychology*, 7(February):  
1080 1–5, 2016. doi: 10.3389/fpsyg.2016.00102.

- 1081 [18] Basile Pinsard, Arnaud Boutin, Ella Gabitov, Ovidiu Lungu, Habib Benali, and Julien  
1082 Doyon. Consolidation alters motor sequence-specific distributed representations. *eLife*, 8:  
1083 1–29, 2019. doi: 10.7554/elife.39324.
- 1084 [19] Tobias Wiestler and Jörn Diedrichsen. Skill learning strengthens cortical representations  
1085 of motor sequences. *eLife*, 2:1–20, 2013. doi: 10.7554/elife.00801.
- 1086 [20] Atsushi Yokoi and Jörn Diedrichsen. Neural Organization of Hierarchical Motor Se-  
1087 quence Representations in the Human Neocortex. *Neuron*, pages 1–13, 2019. doi:  
1088 10.1016/j.neuron.2019.06.017.
- 1089 [21] Patrick Beukema, Jörn Diedrichsen, and Timothy D. Verstynen. Binding During Sequence  
1090 Learning Does Not Alter Cortical Representations of Individual Actions. *The Journal of*  
1091 *Neuroscience*, 39(35):6968–6977, 2019. doi: 10.1523/jneurosci.2669-18.2019.
- 1092 [22] Atsushi Yokoi, Spencer A. Arbuckle, and Jörn Diedrichsen. The Role of Human Primary  
1093 Motor Cortex in the Production of Skilled Finger Sequences. *The Journal of Neuroscience*,  
1094 38(6):1430–1442, 2018. doi: 10.1523/jneurosci.2798-17.2017.
- 1095 [23] Maxime Maheu, Stanislas Dehaene, and Florent Meyniel. Brain signatures of a multiscale  
1096 process of sequence learning in humans. *eLife*, 8:1–24, 2019. doi: 10.7554/elife.41541.
- 1097 [24] J. Doyon, E. Gabitov, S. Vahdat, O. Lungu, and A. Boutin. Current issues related to  
1098 motor sequence learning in humans. *Current Opinion in Behavioral Sciences*, 20:89–97,  
1099 2018. doi: 10.1016/j.cobeha.2017.11.012.
- 1100 [25] Nick Cumming, Mike Page, and Dennis Norris. Testing a positional model of the hebb  
1101 effect. *Memory*, 11(1):43–63, 2003.
- 1102 [26] A Perlman, E Pothos, D Edwards, and J Tzelgov. Task-relevant chunking in sequence  
1103 learning. *Journal of experimental psychology. Human perception and performance*, 36(3):  
1104 649–61, 2010. doi: 10.1037/a0017178.

- 1105 [27] Lauren K. Slone and Scott P. Johnson. When learning goes beyond statistics: Infants  
1106 represent visual sequences in terms of chunks. *Cognition*, 178(June 2015):92–102, 2018.  
1107 doi: 10.1016/j.cognition.2018.05.016.
- 1108 [28] G Bower and D Winzenz. Group structure, coding, and memory for digit series. *Journal*  
1109 *of Experimental Psychology*, 80(2, Pt.2):1–17, 1969. doi: 10.1037/h0027249.
- 1110 [29] D Winzenz. Group structure and coding in serial learning. *Journal of Experimental*  
1111 *Psychology*, 92(1):8–19, 1972. doi: 10.1037/h0032161.
- 1112 [30] A. Norman Redlich. Redundancy Reduction as a Strategy for Unsupervised Learning.  
1113 *Neural Computation*, 5(2):289–304, 1993. doi: 10.1162/neco.1993.5.2.289.
- 1114 [31] David Richter and Floris P. de Lange. Statistical learning attenuates visual activity only  
1115 for attended stimuli. *eLife*, 8:1–27, 2019. ISSN 2050084X. doi: 10.7554/eLife.47869.
- 1116 [32] Caroline D. B. Luft, Alan Meeson, Andrew E. Welchman, and Zoe Kourtzi. Decoding the  
1117 future from past experience: learning shapes predictions in early visual cortex. *Journal of*  
1118 *Neurophysiology*, 113(9):3159–3171, 2015. doi: 10.1152/jn.00753.2014.
- 1119 [33] Shu-Guang Kuai, Dennis Levi, and Zoe Kourtzi. Learning Optimizes Decision Tem-  
1120 plates in the Human Visual Cortex. *Current Biology*, 23(18):1799–1804, sep 2013. doi:  
1121 10.1016/j.cub.2013.07.052.
- 1122 [34] R. Guidotti, C. Del Gratta, A. Baldassarre, G. L. Romani, and M. Corbetta. Vi-  
1123 sual Learning Induces Changes in Resting-State fMRI Multivariate Pattern of Infor-  
1124 mation. *Journal of Neuroscience*, 35(27):9786–9798, jul 2015. ISSN 0270-6474. doi:  
1125 10.1523/JNEUROSCI.3920-14.2015.
- 1126 [35] D MacKay. *Information theory, inference, and learning algorithms*. Cambridge University  
1127 Press, Cambridge, 2003.

- 1128 [36] Hamed Nili, Cai Wingfield, Alexander Walther, Li Su, William Marslen-Wilson, and Niko-  
1129 laus Kriegeskorte. A Toolbox for Representational Similarity Analysis. *PLoS Computa-*  
1130 *tional Biology*, 10(4), 2014. doi: 10.1371/journal.pcbi.1003553.
- 1131 [37] N Kriegeskorte, R Goebel, and P Bandettini. Information-based functional brain mapping.  
1132 *Proceedings of the National Academy of Sciences of the United States of America*, 103(10):  
1133 3863–8, mar 2006. ISSN 0027-8424. doi: 10.1073/pnas.0600244103.
- 1134 [38] T Berdyeva and C Olson. Rank signals in four areas of macaque frontal cortex during  
1135 selection of actions and objects in serial order. *Journal of Neurophysiology*, 104(1):141–59,  
1136 2010. doi: 10.1152/jn.00639.2009.
- 1137 [39] Matthew R. Nassar, Julie C. Helmers, and Michael J. Frank. Chunking as a rational  
1138 strategy for lossy data compression in visual working memory. *Psychological Review*, 125  
1139 (4):486–511, jul 2018. ISSN 1939-1471. doi: 10.1037/rev0000101.
- 1140 [40] Lila Davachi and Sarah DuBrow. How the hippocampus preserves order: The role  
1141 of prediction and context. *Trends in Cognitive Sciences*, 19(2):92–99, 2015. doi:  
1142 10.1016/j.tics.2014.12.004.
- 1143 [41] Liang-Tien Hsieh, Matthias J. Gruber, Lucas J. Jenkins, and Charan Ranganath. Hip-  
1144 pocampal Activity Patterns Carry Information about Objects in Temporal Context. *Neu-*  
1145 *ron*, 81(5):1165–1178, 2014. doi: 10.1016/j.neuron.2014.01.015.
- 1146 [42] A Treves and E Rolls. Computational analysis of the role of the hippocampus in memory.  
1147 *Hippocampus*, 4(3):374–91, 1994. doi: 10.1002/hipo.450040319.
- 1148 [43] Simon Fischer-Baum and Michael McCloskey. Representation of item position in imme-  
1149 mediate serial recall: Evidence from intrusion errors. *Journal of Experimental Psychology:*  
1150 *Learning, Memory, and Cognition*, 41(5):1426, 2015.
- 1151 [44] Andrew E. Papale and Bryan M. Hooks. Circuit Changes in Motor Cortex During Motor  
1152 Skill Learning. *Neuroscience*, 368:283–297, 2018. doi: 10.1016/j.neuroscience.2017.09.010.

- 1153 [45] John W. Krakauer and Reza Shadmehr. Consolidation of motor memory. *Trends in*  
1154 *Neurosciences*, 29(1):58–64, 2006. doi: 10.1016/j.tins.2005.10.003.
- 1155 [46] M Page, N Cumming, D Norris, A McNeil, and G Hitch. Repetition-spacing and item-  
1156 overlap effects in the Hebb repetition task. *Journal of Memory and Language*, 69(4):  
1157 506–526, 2013. doi: 10.1016/j.jml.2013.07.001.
- 1158 [47] D Fendrich, A Healy, and L Bourne. Long-term repetition effects for motoric and percep-  
1159 tual procedures. *Journal of experimental psychology. Learning, memory, and cognition*, 17  
1160 (1):137–51, 1991.
- 1161 [48] K Oberauer and N Meyer. The contributions of encoding, retention, and recall to the Hebb  
1162 effect. *Memory*, 17(7):774–81, 2009. doi: 10.1080/09658210903107861.
- 1163 [49] Kristjan Kalm and Dennis Norris. Recall is not necessary for verbal sequence learning.  
1164 *Memory & cognition*, 44(1):104–13, 2016. doi: 10.3758/s13421-015-0544-0.
- 1165 [50] N White and R McDonald. Multiple parallel memory systems in the brain of the rat.  
1166 *Neurobiology of learning and memory*, 77(2):125–84, 2002. doi: 10.1006/nlme.2001.4008.
- 1167 [51] N Voermans, K Petersson, L Daudey, B Weber, K Van Spaendonck, H Kremer, and Guillén  
1168 Fernández. Interaction between the human hippocampus and the caudate nucleus during  
1169 route recognition. *Neuron*, 43(3):427–35, 2004. doi: 10.1016/j.neuron.2004.07.009.
- 1170 [52] J L McClelland and N H Goddard. Considerations arising from a complementary learning  
1171 systems perspective on hippocampus and neocortex. *Hippocampus*, 6(6):654–65, 1996. doi:  
1172 10.1002/(sici)1098-1063(1996)6:6<654::aid-hipo8>3.0.co;2-g.
- 1173 [53] James L McClelland, Bruce L McNaughton, and Randall C O’Reilly. Why there are com-  
1174plementary learning systems in the hippocampus and neocortex: Insights from the suc-  
1175cesses and failures of connectionist models of learning and memory. *Psychological Review*,  
1176 102(3):419–457, 1995. doi: 10.1037/0033-295x.102.3.419.

- 1177 [54] M. Bunsey and H. Eichenbaum. Conservation of hippocampal memory function in rats  
1178 and humans. *Nature*, 379(6562):255–257, 1996. doi: 10.1038/379255a0.
- 1179 [55] Gordon DA Brown, Tim Preece, and Charles Hulme. Oscillator-based memory for serial  
1180 order. *Psychological Review*, 107(1):127, 2000.
- 1181 [56] Neil Burgess and Graham J Hitch. Toward a network model of the articulatory loop.  
1182 *Journal of Memory and Language*, 31(4):429–460, 1992.
- 1183 [57] Michael E Hasselmo, Marc W Howard, Mrigankka Fotedar, and Aditya V Datey. The  
1184 Temporal Context Model in spatial navigation and relational learning: Toward a common  
1185 explanation of medial temporal lobe function across domains. *Psychological Review*, 112  
1186 (1):75–116, 2006.
- 1187 [58] C Lee and W Estes. Item and Order Information in Short-Term Memory: Evidence for  
1188 Multilevel Perturbation Processes. *Journal of Experimental Psychology : Human Learning  
1189 and Memory*, 7(3):149–169, 1981.
- 1190 [59] R Henson. Positional information in short-term memory: relative or absolute? *Memory  
1191 & Cognition*, pages 915–927, 1999.
- 1192 [60] R Henson. Short-term memory for serial order: the Start-End Model. *Cognitive Psychology*,  
1193 36(2):73–137, 1998. doi: 10.1006/cogp.1998.0685.
- 1194 [61] B Murdock. Context and mediators in a theory of distributed associative memory (TO-  
1195 DAM2)., 1997.
- 1196 [62] B Averbeck, J Sohn, and D Lee. Activity in prefrontal cortex during dynamic selection of  
1197 action sequences. *Nature neuroscience*, 9(2):276–82, 2006. doi: 10.1038/nn1634.
- 1198 [63] T Berdyeva and C Olson. Relation of ordinal position signals to the expectation of reward  
1199 and passage of time in four areas of the macaque frontal cortex. *Journal of Neurophysiology*,  
1200 105(5):2547–2559, 2011. doi: 10.1152/jn.00903.2010.

- 1201 [64] A Nieder, I Diester, and O Tudusciuc. Temporal and Spatial Enumeration Processes  
1202 in the Primate Parietal Cortex. *Science*, 313(5792):1431–1435, 2006. doi: 10.1126/sci-  
1203 ence.1130308.
- 1204 [65] Ann M Graybiel, Toshihiko Aosaki, Alice W Flaherty, and Minoru Kimura. The basal  
1205 ganglia and adaptive motor control. *Science*, 265(5180):1826–1831, 1994.
- 1206 [66] G Miller. The Magical Number Seven, Plus or Minus Two: Some Limits on our Capacity  
1207 for Processing Information. *Psychological Review*, 63:81–97, 1956.
- 1208 [67] Steven J. Luck and Edward K. Vogel. Visual working memory capacity: from psychophysics  
1209 and neurobiology to individual differences. *Trends in Cognitive Sciences*, 17(8):391–400,  
1210 2013. doi: 10.1016/j.tics.2013.06.006.
- 1211 [68] R van den Berg, E Awh, and W Ma. Factorial comparison of working memory models.  
1212 *Psychological review*, 121(1):124–49, 2014. doi: 10.1037/a0035234.
- 1213 [69] P Schramm and J Rouder. Are Reaction Time Transformations Really Beneficial?  
1214 *PsyArXiv*, 2019. doi: 10.31234/osf.io/9ksa6.
- 1215 [70] Harald Baayen and Petar Milin. Analyzing reaction times. *International Journal of Psy-*  
1216 *chological Research*, 3(2):12, 2010. doi: 10.21500/20112084.807.
- 1217 [71] M Kleiner, D Brainard, D Pelli, A Ingling, R Murray, and C Broussard. What’s new in  
1218 Psychtoolbox-3. *Perception 36 ECVF Abstract Supplement.*, 2007.
- 1219 [72] Oscar Esteban, Christopher Markiewicz, Ross W Blair, Craig Moodie, Ayse Ilkay Isik,  
1220 Asier Erramuzpe Aliaga, James Kent, Mathias Goncalves, Elizabeth DuPre, Madeleine  
1221 Snyder, Hiroyuki Oya, Satrajit Ghosh, Jessey Wright, Joke Durnez, Russell Poldrack, and  
1222 Krzysztof Jacek Gorgolewski. Fmriprep: a robust preprocessing pipeline for functional  
1223 MRI. *bioRxiv*, 2018. doi: 10.1101/306951.
- 1224 [73] Oscar Esteban, Ross Blair, Christopher J. Markiewicz, Shoshana L. Berleant, Craig  
1225 Moodie, Feilong Ma, Ayse Ilkay Isik, Asier Erramuzpe, Mathias Kent, James D. and-



1226 Goncalves, Elizabeth DuPre, Kevin R. Sitek, Daniel E. P. Gomez, Daniel J. Lurie, Zhifang  
1227 Ye, Russell Poldrack, and Krzysztof Jacek Gorgolewski. Fmriprep 1.1.7. *Software*, 2018.  
1228 doi: 10.5281/zenodo.852659.

1229 [74] Krzysztof Jacek Gorgolewski, C. D. Burns, C. Madison, D. Clark, Y. O. Halchenko, M. L.  
1230 Waskom, and S. Ghosh. Nipype: a flexible, lightweight and extensible neuroimaging  
1231 data processing framework in python. *Frontiers in Neuroinformatics*, 5:13, 2011. doi:  
1232 10.3389/fninf.2011.00013.

1233 [75] Krzysztof Jacek Gorgolewski, Oscar Esteban, Christopher J. Markiewicz, Erik Ziegler,  
1234 David Gage Ellis, Michael Philipp Notter, Dorota Jarecka, Hans Johnson, Christopher  
1235 Burns, Alexandre Manhães-Savio, Carlo Hamalainen, Benjamin Yvernault, Taylor Salo,  
1236 Kesshi Jordan, Mathias Goncalves, Michael Waskom, Daniel Clark, Jason Wong, Fred  
1237 Loney, Marc Modat, Blake E Dewey, Cindee Madison, Matteo Visconti di Oleggio Castello,  
1238 Michael G. Clark, Michael Dayan, Dav Clark, Anisha Keshavan, Basile Pinsard, Alexandre  
1239 Gramfort, Shoshana Berleant, Dylan M. Nielson, Salma Bougacha, Gael Varoquaux, Ben  
1240 Cipollini, Ross Markello, Ariel Rokem, Brendan Moloney, Yaroslav O. Halchenko, Demian  
1241 Wassermann, Michael Hanke, Christian Horea, Jakub Kaczmarzyk, Gilles de Hollander,  
1242 Elizabeth DuPre, Ashley Gillman, David Mordom, Colin Buchanan, Rosalia Tungaraza,  
1243 Wolfgang M. Pauli, Shariq Iqbal, Sharad Sikka, Matteo Mancini, Yannick Schwartz, Ian B.  
1244 Malone, Mathieu Dubois, Caroline Frohlich, David Welch, Jessica Forbes, James Kent,  
1245 Aimi Watanabe, Chad Cumba, Julia M. Huntenburg, Erik Kastman, B. Nolan Nichols,  
1246 Arman Eshaghi, Daniel Ginsburg, Alexander Schaefer, Benjamin Acland, Steven Giava-  
1247 sis, Jens Kleesiek, Drew Erickson, René Küttner, Christian Haselgrove, Carlos Correa,  
1248 Ali Ghayoor, Franz Liem, Jarrod Millman, Daniel Haehn, Jeff Lai, Dale Zhou, Ross  
1249 Blair, Tristan Glatard, Mandy Renfro, Siqi Liu, Ari E. Kahn, Fernando Pérez-García,  
1250 William Triplett, Leonie Lampe, Jörg Stadler, Xiang-Zhen Kong, Michael Hallquist, An-  
1251 drey Chetverikov, John Salvatore, Anne Park, Russell Poldrack, R. Cameron Craddock,  
1252 Souheil Inati, Oliver Hinds, Gavin Cooper, L. Nathan Perkins, Ana Marina, Aaron Mat-

1253 tfeld, Maxime Noel, Lukas Snoek, K Matsubara, Brian Cheung, Simon Rothmei, Sebastian  
1254 Urchs, Joke Durnez, Fred Mertz, Daniel Geisler, Andrew Floren, Stephan Gerhard, Paul  
1255 Sharp, Miguel Molina-Romero, Alejandro Weinstein, William Broderick, Victor Saase,  
1256 Sami Kristian Andberg, Robbert Harms, Kai Schlamp, Jaime Arias, Dimitri Papadopou-  
1257 los Orfanos, Claire Tarbert, Arielle Tambini, Alejandro De La Vega, Thomas Nickson,  
1258 Matthew Brett, Marcel Falkiewicz, Kornelius Podranski, Janosch Linkersdörfer, Guil-  
1259 laume Flandin, Eduard Ort, Dmitry Shachnev, Daniel McNamee, Andrew Davison, Jan  
1260 Varada, Isaac Schwabacher, John Pellman, Martin Perez-Guevara, Ranjeet Khanuja, Nico-  
1261 las Pannetier, Conor McDermottroe, and Satrajit Ghosh. Nipype. *Software*, 2018. doi:  
1262 10.5281/zenodo.596855.

1263 [76] N. J. Tustison, B. B. Avants, P. A. Cook, Y. Zheng, A. Egan, P. A. Yushkevich, and J. C.  
1264 Gee. N4itk: Improved n3 bias correction. *IEEE Transactions on Medical Imaging*, 29(6):  
1265 1310–1320, 2010. doi: 10.1109/tmi.2010.2046908.

1266 [77] Anders M. Dale, Bruce Fischl, and Martin I. Sereno. Cortical surface-based analy-  
1267 sis: I. segmentation and surface reconstruction. *NeuroImage*, 9(2):179–194, 1999. doi:  
1268 10.1006/nimg.1998.0395.

1269 [78] Arno Klein, Satrajit S. Ghosh, Forrest S. Bao, Joachim Giard, Yrjö Häme, Eliezer Stavsky,  
1270 Noah Lee, Brian Rossa, Martin Reuter, Elias Chaibub Neto, and Anisha Keshavan. Mind-  
1271 boggling morphometry of human brains. *PLOS Computational Biology*, 13(2):e1005350,  
1272 2017. doi: 10.1371/journal.pcbi.1005350.

1273 [79] VS Fonov, AC Evans, RC McKinstry, CR Almli, and DL Collins. Unbiased nonlinear aver-  
1274 age age-appropriate brain templates from birth to adulthood. *NeuroImage*, 47, Supplement  
1275 1:S102, 2009. doi: 10.1016/s1053-8119(09)70884-5.

1276 [80] B.B. Avants, C.L. Epstein, M. Grossman, and J.C. Gee. Symmetric diffeomor-  
1277 phic image registration with cross-correlation: Evaluating automated labeling of el-

- 1278 derly and neurodegenerative brain. *Medical Image Analysis*, 12(1):26–41, 2008. doi:  
1279 10.1016/j.media.2007.06.004.
- 1280 [81] Y. Zhang, M. Brady, and S. Smith. Segmentation of brain MR images through a hidden  
1281 markov random field model and the expectation-maximization algorithm. *IEEE Transac-*  
1282 *tions on Medical Imaging*, 20(1):45–57, 2001. doi: 10.1109/42.906424.
- 1283 [82] Douglas N Greve and Bruce Fischl. Accurate and robust brain image align-  
1284 ment using boundary-based registration. *NeuroImage*, 48(1):63–72, 2009. doi:  
1285 10.1016/j.neuroimage.2009.06.060.
- 1286 [83] Mark Jenkinson, Peter Bannister, Michael Brady, and Stephen Smith. Improved optimiza-  
1287 tion for the robust and accurate linear registration and motion correction of brain images.  
1288 *NeuroImage*, 17(2):825–841, 2002. doi: 10.1006/nimg.2002.1132.
- 1289 [84] Robert W. Cox and James S. Hyde. Software tools for analysis and visualization  
1290 of fmri data. *NMR in Biomedicine*, 10(4-5):171–178, 1997. doi: 10.1002/(sici)1099-  
1291 1492(199706/08).
- 1292 [85] C. Lanczos. Evaluation of noisy data. *Journal of the Society for Industrial and Applied*  
1293 *Mathematics Series B Numerical Analysis*, 1(1):76–85, 1964. doi: 10.1137/0701007.
- 1294 [86] Jeanette Mumford, Benjamin Turner, Gregory Ashby, and Russell Poldrack. Deconvolving  
1295 BOLD activation in event-related designs for multivoxel pattern classification analyses.  
1296 *NeuroImage*, 59(3):2636–43, 2012. doi: 10.1016/j.neuroimage.2011.08.076.
- 1297 [87] Christophe Destrieux, Bruce Fischl, Anders Dale, and Eric Halgren. Automatic parcella-  
1298 tion of human cortical gyri and sulci using standard anatomical nomenclature. *NeuroImage*,  
1299 53(1):1–15, oct 2010. doi: 10.1016/j.neuroimage.2010.06.010.
- 1300 [88] Y Ninokura, H Mushiake, and J Tanji. Integration of temporal order and object informa-  
1301 tion in the monkey lateral prefrontal cortex. *J Neurophysiol*, 91(1):555–560, 2004. doi:  
1302 10.1152/jn.00694.2003.

- 1303 [89] Andrew C Heusser, David Poeppel, Youssef Ezzyat, and Lila Davachi. Episodic sequence  
1304 memory is supported by a theta–gamma phase code. *Nature Neuroscience*, 19(10):1374–  
1305 1380, 2016. doi: 10.1038/nn.4374.
- 1306 [90] K Kalm and D Norris. The representation of order information in auditory-  
1307 verbal short-term memory. *The Journal of Neuroscience*, 34:6879–86, 2014. doi:  
1308 10.1523/jneurosci.4104-13.2014.
- 1309 [91] Jörn Diedrichsen, Serge Provost, and Hossein Zareamoghaddam. On the distribution of  
1310 cross-validated Mahalanobis distances. *arXiv*, pages 1–24, 2016.
- 1311 [92] Marijke Welvaert and Yves Rosseel. On the definition of signal-to-noise ratio and contrast-  
1312 to-noise ratio for fMRI data. *PLoS ONE*, 8(11), 2013. doi: 10.1371/journal.pone.0077089.
- 1313 [93] Cameron T Ellis, Christopher Baldassano, Anna C Schapiro, Ming Bo Cai, and Jonathan D  
1314 Cohen. Facilitating open-science with realistic fMRI simulation: validation and applica-  
1315 tion. *bioRxiv*, 2019. doi: 10.1101/532424.
